# Supplementary material
Source: PubMed Central journal article supplement (PMC3786161)
Supplement: NIHMS516215-supplement-Supplementary_data.pdf [file NIHMS516215-supplement-Supplementary_data.pdf]

## Supporting Online Material for

### RNAi in Budding Yeast

Ines A. Drinnenberg, David E. Weinberg, Kathleen T. Xie, Jeffrey P. Mower,  
Kenneth H. Wolfe, Gerald R. Fink, David P. Bartel\*

\*To whom correspondence should be addressed. E-mail: [dbartel@wi.mit.edu](mailto:dbartel@wi.mit.edu)

This PDF file includes  
Materials and Methods  
Figs. S1 to S12  
Tables S1 to S4 and S6 to S8  
References

Other Supporting Online Material for this manuscript includes the following:  
Table S5. Transcripts that overlap siRNA-producing loci.

# Drinnenberg et al., *Science* 2009

## Supporting Online Material

### Materials and Methods

#### Growth conditions and genetic manipulations

*S. castellii* was grown at 25°C on standard *S. cerevisiae* plate and liquid media (e.g., YPD and SC). Transformations were performed as described (S1) with some modifications. Either 0.5–2 µg plasmid DNA or 1–7 µg linear DNA was added to 5 µl single-stranded DNA (10 mg/ml salmon sperm DNA, Sigma D7656), mixed with 50 µl yeast (~3 x 10<sup>8</sup> cells in 100 mM lithium acetate), and added to transformation buffer (a mixture of 240 µl 40% PEG 3350 and 36 µl 1 M lithium acetate). After incubation at 25°C for 30–90 min, 35 µl of DMSO was added, and the entire mixture was incubated at 42°C for 10 min, resuspended, and then plated on selective media.

*Other species.* Growth temperatures were as follows, unless otherwise noted: *K. polysporus*, 25°C; *S. cerevisiae*, *S. bayanus*, and *C. albicans*, 30°C; *E. coli*, 37°C.

#### Strain construction

A list of strains used and generated in this study is provided (table S7).

*Heterothallic strains.* Most of our strains started with the homothallic *S. castellii* strain Y235 (*ura3-1/ura3-1*, *Ho/Ho*), generously provided by M. Cohn (*ura3-1* is a point mutation G541A that creates the amino acid substitution G181R). To delete the Ho endonuclease, the loxP-KanMX6-loxP module of plasmid pUG6 (S2) was used as a template to amplify the disruption cassette by fusion PCR (S3), with ~400-bp targeting arms on both sides of the cassette (primers 5'-TGATCGAAGAAGGCACTAGAA and 5'-CAGATCCACTAGTGGCCTATGCGGCCGCTGTCATTGAAAATCGCCAAA, 5'-GCGTACGAAGCTTCAGCTGGCGGCCGCGCCAAATTCTTCTGCAACT and 5'-TTTTTCGGACTTCACGAGCTT). The resulting heterozygous strain (*ura3-1/ura3-1*, *Ho/ho::loxP-KanMX-loxP*) was transformed with pSH47 (S2), which encodes the *Cre* recombinase under the control of the *S. cerevisiae* *GALI* promoter. The expression of *Cre* was induced for 2 h in liquid culture, and strains sensitive to G418 were isolated. This strain was transferred to sporulation medium (1% potassium acetate, 0.1% yeast extract, 0.05% glucose) for 4 days, and tetrads were dissected. Although sporulation efficiency and spore viability were generally low in Y235, stable heterothallic strains of mating type **a** and  $\alpha$  (DPB004 and DPB005, respectively) could be derived from a tetrad with four viable spores, showing that *S. castellii ho* deletion strains could not switch mating type.

*Deletion of AGO1 and DCR1.* *AGO1* and *DCR1* were deleted using the hygromycin cassette of pAG32 (S4) and the loxP-KanMX6-loxP cassette of pUG6 as dominant selection markers, respectively. For diploids, homozygous deletions (DPB002 and DPB003) were generated first by deleting one copy in Y235, sporulating the resulting heterozygotes, and allowing isolated spores to grow, switch mating types, and mate. *AGO1* and *DCR1* were deleted in DPB004 and DPB005 to generate DPB006, DPB007, DPB008, DPB009, and DPB313. The *AGO1* disruption construct was created as follows: *AGO1* was amplified from genomic DNA (5'-TGAACGTGTGGAAGACCAAA and

5'-AGTGGCTAACGGCAACATATCAGACA) and cloned into pCR4Blunt-TOPO (Invitrogen); the hygromycin cassette was then inserted between the *Hind*III and *Age*I restriction sites within the *AGO1* genomic fragment; the *AGO1* disruption construct was then amplified with the same primers used for *AGO1* cloning. Deletion of *DCR1* was analogous to deletion of *Ho* (fusion PCR primers 5'-TTCAACACCTCCAGCAACAG and 5'-CAGATCCACTAGTGGCCTATGCGGCCGAGGCATTGCAACAATCTGTG, 5'-GCGTACGAAGCTTCAGCTGGCGGCCGCGCTGTTGCTGGAGGTGTTGAA and 5'-TTTACCACCATACCATGAGTTTTT).

*Tagged Ago1 strain for immunoprecipitation.* A haploid strain expressing Flag<sub>3</sub>-tagged Ago1 from its native promoter (DPB220) was constructed by two-step homologous recombination in DPB005, as follows: a *S. cerevisiae* *URA3* expression cassette (amplified from pYES2.1, Invitrogen) was used to replace the start codon of *AGO1* by transformation and selection of transformants on SC-ura plates; the *URA3* cassette was subsequently replaced by a Flag<sub>3</sub> tag (amplified with a start codon from pQCXIP, gift of D. Sabatini) by transformation and selection on 5-FOA.

*S. castellii GFP reporter strains.* The loxP-KanMX6-loxP cassette in DPB009 was removed by *Cre* expression as described above to generate DPB318. The GFP(S65T)-KanMX6 module from pFA6a (*S5*) was then integrated at the endogenous *ura3* locus in DPB005, DPB313, and DPB318 (such that GFP was fused in-frame directly after the ATG start codon of *ura3*) to generate GFP-expressing strains DPB314, DPB317, and DPB321. The silencing constructs (pIp, pIp-weakSC\_GFP, and pIp-strongSC\_GFP) were integrated upstream of the ORF annotated as Scas\_633.2 in DPB314, DPB317, and DPB321 to create strains DPB331–DPB339. For these integrations, each silencing construct was linearized by digestion with *Sac*I, and 1.5 μg was transformed. Transformants were selected on SC-ura plates.

*S. cerevisiae RNAi reporter strains.* The GFP(S65T)-KanMX6 module from pFA6a was integrated at the endogenous *ura3* locus in L4718 to create DPB249. Integration of Ago1 and Dcr1 expression vectors (pRS404-*P*<sub>TEF</sub>-Ago1 and pRS405-*P*<sub>TEF</sub>-Dcr1) and GFP silencing construct vectors (pRS403-*P*<sub>GALI</sub>-weakSC\_GFP and pRS403-*P*<sub>GALI</sub>-strongSC\_GFP) into the genome was done by linearization and transformation using standard protocols (*S6*) to create DPB250, DPB251, and DPB255–DPB260. To generate strains useful for *URA3* silencing, DPB249 and DPB258 were transformed with functional *URA3* coding sequence amplified from pRS406 to create the uracil prototrophs DPB271 and DPB275, respectively. Integration of the silencing construct pRS403-*P*<sub>GALI</sub>-hpSC\_URA3 into DPB271 and DPB275 generated DPB272 and DPB276, respectively.

## Plasmid construction

A list of plasmids generated in this study is provided (table S8).

*Yeast Ago1 and Dcr1 expression plasmids.* *S. castellii* *AGO1* or *DCR1* was cloned into pYES2.1 (Invitrogen) to produce the galactose-inducible Ago1 and Dcr1 expression plasmids pYES2.1-Ago1 and pYES2.1-Dcr1, respectively. *GFP* was also cloned into pYES2.1 (creating pYES2.1-GFP) as a negative control.

*E. coli recombinant expression plasmids.* For recombinant expression of Dcr1 in *E. coli*, *DCR1* was cloned into pET101/D-TOPO, creating pET101-Dcr1. pET101-lacZ was supplied by the manufacturer (Invitrogen).

*S. castellii GFP silencing constructs.* A multiple cloning site containing *XhoI* and *EcoRI* restriction sites was cloned between the *PvuII* and *XbaI* restriction sites of pYES2.1. For the strong silencing construct, 275 bp of *GFP* sequence from pFA6a was then cloned in the sense orientation between *PvuII* and *XhoI* sites, and in the antisense orientation between *EcoRI* and *XbaI* sites, in *E. coli* SURE (Stratagene). The weak silencing construct was made identically, except without *GFP* sequence in the antisense orientation. A 73-bp sequence spanning intron 1 from *S. pombe rad9* was then added between *XhoI* and *EcoRI* sites (modeled after (S7)). To convert these episomal plasmids into integrating plasmids, the 2-micron and *f1* origins were then replaced (using *NheI* and *SpeI* sites) by sequence from *S. castellii* sc633:288301–289016 (amplified from genomic DNA with 5'-AAAAGCTAGCGATCCCTTATCAAATATGGTAC and 5'-AAAACTAGTGTAGAATCCAGAGAATAGAATC). These resulting *S. castellii* integrating plasmids expressing weak and strong *GFP* silencing constructs are pIp-weakSC\_GFP and pIp-strongSC\_GFP, respectively. The pIp empty vector was created by replacing the hairpin of pIp-strongSC\_GFP with *XhoI* and *EagI* sites.

*S. cerevisiae reconstitution and silencing constructs.* Vectors pRS404-P<sub>TEF</sub>-Ago1 and pRS405-P<sub>TEF</sub>-Dcr1 were constructed by insertion of the coding sequence of the respective *S. castellii* genes between the *TEF* promoter and *CYCI* terminator (cloned from pRS416-P<sub>TEF</sub> (S8)) of the appropriate vector (S9) using *SpeI* and *XhoI* sites (Ago1) or *XbaI* and *XhoI* sites (Dcr1). To generate vectors pRS403-P<sub>GALI</sub>-strongSC\_GFP and pRS403-P<sub>GALI</sub>-weakSC\_GFP, an expression cassette containing the *GALI* promoter, *CYCI* terminator, and GFP silencing construct sequence was cloned out of the appropriate episomal pYES2.1 silencing construct into the *NotI* and *Sall* sites of pRS403. To generate the *URA3* silencing vectors, 339 bp of *URA3* sequence from pRS406 was initially cloned into the episomal pYES2.1 GFP weak silencing construct in the sense orientation between *PvuII* and *XhoI* sites (thereby replacing the *GFP* sequence), and in the antisense orientation between *EcoRI* and *XbaI* sites. pRS403-P<sub>GALI</sub>-hpSC\_URA3 was then created by cloning an expression cassette containing the *GALI* promoter, *CYCI* terminator, and *URA3* silencing construct sequence out of this pYES2.1 plasmid into the *NotI* and *Sall* sites of pRS403.

### ***In vitro* dsRNase assays**

*Substrates.* Blunt-ended dsRNA substrate was prepared by simultaneous *in vitro* transcription from two PCR templates carrying T7 promoter sequences at opposite ends. Reactions were assembled using the MAXIscript Kit (Ambion) with a 32:1 molar ratio of UTP:[ $\alpha$ -<sup>32</sup>P]UTP (800 Ci/mmol) according to the manufacturer's directions. Control ssRNA was prepared similarly, except that a single PCR template was included in the transcription reaction. DNase-treated RNA was fractionated on a 4% urea gel, eluted from gel slices in 0.3 M NaCl overnight at 4°C, and ethanol precipitated.

*Strains.* Wild-type strains used in Figure 2A were *S. castellii* Y235, *K. polysporus* KpolWT, *C. albicans* Can14, and *S. cerevisiae* FY45. Strains used in Figure 2E were as follows: *S. castellii*, DPB005, DPB318, and DPB318 transformed with pYES2.1-Dcr1; *S. cerevisiae*, F2005 and F2005 transformed with either pYES2.1-Dcr1 or pYES2.1-GFP; *E. coli*, BL21 Star(DE3) (Invitrogen) transformed with either pET101-lacZ or pET101-Dcr1.

**Extracts.** Strains in Figure 2A were grown in YPD to OD<sub>600</sub> 1.2–1.6; yeast strains in Figure 2E were grown similarly, except P<sub>GALI</sub> strains were grown in SC–ura with galactose/raffinose, and all strains were grown at 25°C; *E. coli* were grown in LB with 100 µg/ml ampicillin to OD<sub>600</sub> 0.6 and induced (1 mM IPTG) for 4 h. Cells were harvested by centrifugation and flash frozen in 100–200 mg aliquots. Aliquots were thawed on ice, resuspended in 1 µl/mg lysis buffer [50 mM HEPES pH 7.6, 5 mM MgCl<sub>2</sub>, 0.1 mM EDTA, 0.1 mM EGTA, 300 mM sodium acetate, 5% glycerol, 0.25% NP-40, protease inhibitor cocktail (Roche), 1 mM PMSF], and vortexed four times for 45 s at 4°C with an equal volume of glass beads. Lysates were clarified by centrifugation at 10,000x g for 5 min. Extract concentrations were normalized according to absorbance at 260 nm and stored at –80°C.

**Reactions.** The 20 µl reactions contained 10 µl extract (or 10 µl lysis buffer for “Buffer only” control), 4 µl 5X reaction buffer (125 mM HEPES pH 7.2, 10 mM magnesium acetate, 10 mM DTT, 5 mM ATP), and 10,000 cpm radiolabeled substrate. In Figure 2A, reactions were incubated at 25°C (*S. castellii* and *K. polysporus*) or 30°C (all others) for 2 h; in Figure 2E all reactions were incubated at 25°C. Reactions were quenched with AE Buffer (50 mM sodium acetate pH 5.5, 10 mM EDTA) and phenol extracted.

## RNA blots

Total RNA was isolated using the hot phenol method. Small RNA blots were performed using 10–15 µg total RNA per lane and carbodiimide-mediated cross-linking to the membrane (*S10*), with the following DNA probes radiolabeled at their 5′ termini: *S. castellii* siRNA sc1056, 5′-CTATCTTCATCGATTACCATCTA; *S. castellii* U6 small nuclear RNA, 5′-TATGCAGGGGAAGTCTGAT; *GFP* siRNA, 5′-ACCATTATCAACAAAATACTCCAATTGGCGATGGCCCTGTCCTTTTACCA; Ty1 probe 1, 5′-CCGTTAGACGTTTTAGCTTCCAAAACAGAAGAATGTGAGAAGGCTTCCACTAAG; Ty1 probe 2, 5′-TAAATTAGTGGAAGCTGAAACGCAAGGATTGATAATGTAATAGGATCAATGAATATAAAC. mRNA blots were performed using 4–5 µg DNase-treated total RNA per lane and UV crosslinking. *GFP* and Ty1 body-labeled antisense riboprobes were prepared by using PCR products as templates for in vitro transcription (MaxiScript kit, Ambion). A radiolabeled *PYK1* (*CDC19*) DNA probe was prepared by random priming (Prime-It II, Stratagene).

Strains used in Figure 2B were Y235, DPB002, DPB002 transformed with pYES2.1-Ago1, DPB003, and DPB003 transformed with pYES2.1-Dcr1. Strains used in Figure 4B were DPB331–DPB339. Strains used in Figure 4D and 4F were DPB249–DPB251, and DPB255–DPB260. Strains used in Figure 5D were DPB249, DPB255, and DPB258.

## RT-PCR

Reverse transcription reactions were performed with 100 ng total RNA using Superscript III according to the manufacturer’s instructions (Invitrogen) with the following gene-specific primers in the same reaction: *GFP*, 5′-TGTGGTCTCTCTTTTCGTTGG; *ACT1*, 5′-TCAAAGAAGCCAAGATAGAACCA. PCR reactions were assembled in 100 µl with 2 µl RT reaction using the following primers: *GFP*, 5′-TTTCACTGGAGTTGTCCCAAT and 5′-GAAAGGGCAGATTGTGTGG; *ACT1*, 5′-ACGTTGGTGATGAAGCTCAA and 5′-ATACCTGGGAACATGGTGGT. After the indicated number

of cycles, a 15  $\mu$ l aliquot was removed and combined with 3  $\mu$ l 6X DNA loading dye. 6  $\mu$ l was loaded onto a 1.5% agarose gel, and DNA was visualized by EtBr staining.

### Plasmid loss

DPB005, DPB313, and DPB008 were transformed with 1.5  $\mu$ g pRS316 (*S8*), pYES2.1-weakSC\_GFP, pYES2.1-Ago1, or pYES2.1-Dcr1. Transformants were plated directly on SC-ura plates containing 2% glucose (uninduced) or 2% galactose (induced). To analyze plasmid loss, cells from colonies were inoculated in 5 ml of the medium indicated in Figure S11 and passaged once a day for 4 days.

### Southern blots

Each lane contained 2  $\mu$ g of RNA-free DNA isolated as described in (*S11*) and digested with *Xba*I. Plasmids were detected using a probe with the ampicillin-resistance gene sequence (amplified using primers 5'-CCATGAGTGATAACACTGCG and 5'-GGCACCTATCTCAGCGATC). The genomic locus was detected using a probe with sequence from *S. castellii* sc718:138001–138427 (amplified using primers 5'-GCATAAGCTGTGCTTTAGACT and 5'-CTTGTAACGGTTCAATTCTAGC).

### FACS analysis

Two biological replicates of each strain were inoculated in SC, either noninducing (2% glucose) or inducing (*S. castellii*, 2% galactose; *S. cerevisiae*, 1% galactose and 1% raffinose), and grown overnight. Fresh cultures were then seeded from the overnight cultures and cells were grown to log-phase. Cells were analyzed using FACSCalibur (BD Biosciences); data were processed with CellQuest Pro (BD Biosciences) and FlowJo (Tree Star). The same samples were used for RNA and GFP analyses.

### *S. cerevisiae* URA3 silencing

Strains (DPB249, DPB271–DPB272, DPB258, DPB275–DPB276) were inoculated in SC under inducing conditions (1% galactose and 1% raffinose) and grown for 1 day. Cells were diluted to OD<sub>600</sub> of 1.0, and 1:10 serial dilutions were spotted onto the appropriate plates (SC, SC-ura, or 5-FOA; all containing 1% galactose and 1% raffinose) and grown at 30°C for 3 days.

### *S. cerevisiae* Ty1 analysis

*Transposition assay.* Strains (DPB249, DPB255, and DPB258) were transformed with 1  $\mu$ g of pGTyH3HIS3 (galactose-inducible Ty1 marked with *HIS3*, where transcription of the Ty1 and *HIS3* is in the same direction) (*S12*) and selected on SC-ura plates. Transformants were streaked out on SC-ura with 2% galactose plates and grown at 20°C for 2 days to induce transposition. Cells were then replica-plated onto YPD plates and grown at 30°C for 1 day for plasmid loss. These cells were then replica-plated onto 5-FOA-his plates (to select for both plasmid loss and transposition) or 5-FOA plates (to select for plasmid loss only) and grown at 30°C for 2–3 days.

When using the more standard *his3*-artificial-intron marker for retrotransposition (*S13*), analogous results were obtained but were not as informative because the marker produces a non-physiological antisense transcript, which could pair with the sense transcript to generate an ectopic dsRNA trigger.

**RNA and protein analysis.** Strains (DPB249, DPB255, and DPB258) were inoculated in SC and grown overnight. For non-transposition-inducing conditions, cells were diluted to OD<sub>600</sub> 0.125 and grown at 30°C to OD<sub>600</sub> 0.9–1.0. For transposition-inducing conditions, cells were diluted to 100 cells/ml and grown at 20°C to OD<sub>600</sub> 0.9–1.0. Cells were harvested by centrifugation and flash frozen.

**Immunoblotting.** Three OD<sub>600</sub> units of cells were resuspended in 100 ml H<sub>2</sub>O. After adding 160 µl of extraction buffer (1.85 M NaOH, 7.4% β-mercaptoethanol), cells were incubated on ice for 10 min. 160 µl of 50% trichloroacetic acid was added, and cells were incubated on ice for an additional 10 min. Precipitated material was collected by centrifugation, and the supernatant was discarded. The tube was washed with 500 µl of 1 M Tris pH 8.0, centrifuged briefly, and the supernatant was discarded. The pellet was vigorously resuspended in 150 µl of 1X Laemlli sample buffer and boiled for 4 min. Samples (12 µl each) were resolved by SDS-PAGE, transferred to poly(vinylidene difluoride) in CAPS-ethanol pH 10, and probed sequentially with Ty1-VLP antiserum (*S14*, *S15*) and anti-actin (Abcam, ab8224). Immunoblots were developed with HRP-conjugated anti-rabbit or anti-mouse antibodies and enhanced chemiluminescence (Amersham).

### Small-RNA sequencing and analysis

**Library preparation.** Total RNA was isolated using hot phenol from log-phase YPD cultures of *S. castellii* F2037, *K. polysporus* KpolWT, *S. cerevisiae* FY45, *S. bayanus* F2035, and *C. albicans* Can14. Small-RNA cDNA libraries were prepared as described (*S16*) and sequenced using the Illumina SBS platform. Libraries were also prepared and sequenced from RNAi deletion strains (DPB002 and DPB003).

**Ago1 immunoprecipitation.** A saturated overnight culture of DPB249 was diluted to OD<sub>600</sub> 0.3 in 150 ml YPD and grown to OD<sub>600</sub> 1.5. Extracts were prepared as for *in vitro* dsRNase assays. For the input fraction, one-fifth of the extract was removed and added to AE buffer. Anti-Flag M2 agarose (Sigma) was incubated with the remaining extract at 4°C for 1.5 h. Beads were washed with lysis buffer four times, after which the remaining buffer was removed and AE buffer was added. Small RNA libraries were prepared as described above.

**Read processing.** After removing the adaptor sequences, reads representing the small RNAs were collapsed to a non-redundant set, and 14–30-nt sequences were mapped to the appropriate genome, allowing no mismatches and recovering all hits (table S1). When counting the reads matching a locus, the count was hit-normalized, i.e., normalized to the number of times that a small-RNA sequence matched the genome. For example, a small RNA sequenced twice that mapped to the genome five times contributed 0.4 read counts to each genomic locus. Sequence and feature files for *S. cerevisiae* S288C and *C. albicans* SC5314 were obtained from the *Saccharomyces* Genome Database (SGD) on September 10, 2007 and the *Candida* Genome Database Assembly 21. Sequence files for *S. bayanus* MCYC623 that were current as of January 18, 2009 were downloaded from NCBI. Sequence and feature files for *S. castellii* CBS4309 and

*K. polysporus* DSM70294 were obtained from the Yeast Gene Order Browser (YGOB) (S17). Using the set of *S. cerevisiae* tRNA and rRNA sequences as queries for blastn alignments (e-value cutoff, e-10), genomic loci mapping to tRNA and rRNA in *S. castellii*, *K. polysporus*, and *S. bayanus* were identified. In *K. polysporus*, tRNA and rRNA annotations were available in the GenBank flatfile obtained from YGOB and used to supplement the alignments.

*Initial identification of siRNA clusters.* For the small RNAs sequenced from total RNA, genomic regions giving rise to siRNAs were identified by parsing the genome files from *S. castellii*, *K. polysporus*, and *C. albicans* into non-overlapping windows of 500 bp. Windows with high levels of siRNA expression (22–23-nt sequences for *S. castellii* and *K. polysporus*, 21–22-nt sequences for *C. albicans*; excluding tRNA and rRNA reads) were selected by applying read and sequence density cutoffs manually adjusted based on the data set (*S. castellii*,  $\geq 10$  reads/kb or  $\geq 10$  genome matches/kb; *K. polysporus*,  $\geq 50$  reads/kb or  $\geq 50$  genome matches/kb; *C. albicans*,  $\geq 40$  reads/kb or  $\geq 40$  genome matches/kb). Adjacent windows passing the density cutoffs were concatenated. The small-RNA profile of each of these clusters was manually inspected for adherence to properties, including length (23 nt for *S. castellii* and *K. polysporus*; 22 nt for *C. albicans*) and 5'-nt biases (U for *S. castellii* and *K. polysporus*; A or U for *C. albicans*).

*Refined identification of siRNA clusters in S. castellii.* Using sequencing reads of small RNAs co-purifying with Ago1, a hidden Markov model (HMM) was constructed with two states, “C” (giving rise to siRNAs) and “N” (not giving rise to siRNAs). The ratio of 23-mer reads relative to all reads (excluding 22-mer reads) was calculated in 10-bp windows (apportioning hit-normalized counts to the windows based on the fraction of its nucleotides covered by the small RNA) to define two types of emissions: 0) ratio  $\geq 0.45$  and 1) ratio  $< 0.45$ . Emission probabilities were generated by training on the initially identified siRNA clusters to represent the “C” state, and training on five supercontigs (sc1014, sc621, sc542, sc534 and sc587) to represent the “N” state. Transition probabilities for the given window size were estimated using the median length of these siRNA clusters (250 bp) that map to Y' elements and palindromic arms, or the average length of the intervening genomic sequence between two clusters, i.e. the difference derived from the total length of all contigs (11,354,548 bp) divided by the number of clusters identified in the initial analysis (100). Initial state probabilities were calculated based on the proportion of contigs in “C” state, i.e. total length of siRNA clusters (25,000 bp) divided by the total length of all contigs. Using the Viterbi algorithm, the contigs were parsed over non-overlapping 10-bp windows. The parse yielded 379 clusters (table S3) with the three regions that map to rRNA excluded. The cluster boundaries were adjusted to include the full sequence of all small RNAs with at least one nucleotide mapping to the cluster and to exclude terminal nucleotides not covered by a small RNA.

*Cluster annotation.* Clusters were further characterized based on previous genome annotations and alignments. Reads for Figure 1C (21–23 nt) and for figure S3 (22–23 nt) were classified into categories. Reads of siRNA clusters that mapped to annotated ORFs in either sense or antisense orientation were grouped together in Figure 1C as reads from ORF clusters. Using the Flag<sub>3</sub>-Ago1 IP dataset, siRNA reads in clusters overlapping ORFs were further separated into “clusters sense to ORF” and “clusters antisense to ORF.” siRNA reads that mapped to convergent overlapping ORF transcripts (annotated using the mRNA-Seq dataset) were categorized as “overlap.”



The DNA sequences of the siRNA clusters from the *S. castellii* and *K. polysporus* datasets were aligned against the *S. cerevisiae* protein dataset (NCBI) using blastx (e-value cutoff 0.001). Significant alignments to Ty elements were extended 300 nt on both sides, and reads overlapping these extended alignments were classified as Ty-proximal siRNA reads. Additional Ty elements could be identified using annotated Ty elements from (*S18*) as blastx queries. More careful Ty annotations for *S. castellii* could then be made by identifying *S. castellii* Ty LTR, gag, and pol sequences based on the initial blastx matches and other Ty sequence signatures ((*S18-20*) and references therein). Similarly, siRNA clusters derived from Y' elements were detected. For cases in which siRNA expression exceeded the boundaries of the annotated Y' element ORF in a processive, un-gapped fashion, those siRNAs were still classified as Y'-element-proximal siRNAs. siRNA clusters in *C. albicans* were annotated based on the *C. albicans* genome annotation and blastx alignments against the set of protein sequences downloaded from NCBI (e-value cutoff 0.001).

Palindromes were predicted using the IRF program (*S21*) with the following parameters: Alignment Parameters, 2, 3, and 5 (match, mismatch, and indels, respectively); minimum Alignment Score To Report Repeat, 100; T4 small palindromes (20–80+ nt) loop length, 100 nt; T5 medium palindromes (80–300+ nt) loop length, 1000 nt; T7 large palindromes (300–2400+ nt) loop length, 5000 nt; maximal loop length, 5000 nt; maximal stem length, 10,000 nt; allow GT matches. The following numbers of palindromes were identified: 66 in *S. castellii*, 222 in *K. polysporus*, 61 in *C. albicans*, and 390 in *S. cerevisiae*. These palindromes were compared to our lists of siRNA-generating loci. In most cases when overlap was observed, the 22–23-nt RNAs were enriched in the inverted-repeat regions rather than the intervening region or surrounding regions. In some cases the palindromes overlapped with each other and the one with 22–23-nt RNAs mapping to the repeats was the one chosen. In some cases (10 of 43 for *S. castellii*, and 42 of 90 for *K. polysporus*), the overlap of 22–23-nt RNAs was not preferentially at the repeats; these were not classified as palindromic clusters. Using the initial datasets, these analyses revealed 19 palindromic siRNA clusters in *S. castellii* and 29 in *K. polysporus*, all of which either overlapped or were contained within the set of siRNA clusters identified by the sliding window approach. The refined cluster identification based on the Flag<sub>3</sub>-Ago1 IP dataset from *S. castellii* revealed 23 palindromic siRNA clusters (table S5).

*Phasing analysis.* The frequency of distances separating all 23-mer 5'-end pairs (*i, j*) mapping to the same DNA strand was calculated using the following equation:

$$Frequency_D = \sum_{i,j} (Reads_i \cdot Reads_j)_D$$

where *D* = distance between sRNA 5' ends

The frequency of distances separating pairs of 23-mer 5' ends mapping to opposite strands of DNA was calculated separately using the same equation.

## Phylogenetic analysis

Psi symbols for *S. pastorianus* (Fig. 1A) indicate a highly degraded *AGO1* pseudogene and a *DCR1* pseudogene that is intact except for a single internal stop codon. The intact *S. bayanus* *DCR1* gene shows conservation of amino acid sequence relative to the *S. pastorianus*

pseudogene ( $dN/dS$  ratio 0.3) despite the absence of intact *AGO1* in both species. The *AGO1* and *DCR1* loci are syntenic among *S. castellii*, *K. polysporus*, *S. pastorianus*, and *S. bayanus*.

A maximum-likelihood (ML) tree of RNaseIII domains was constructed using the PHYLIP software package (<http://evolution.genetics.washington.edu/phylip.html>). RNaseIII domains were predicted using SMART (S22, 23). The amino acid sequences of the RNaseIII domains were used to compute a multiple sequence alignment using TCOFFEE (S24). A consensus ML tree was built by running DNAML (PHYLIP) on the amino acid alignment after bootstrap re-sampling (500 replicates) of the data set using SEQBOOT (PHYLIP). The phylogenetic tree was displayed using TreeView (<http://taxonomy.zoology.gla.ac.uk/rod/treeview.html>).

Protein name/accession numbers used in Figure 2D are as follows: At1, *A. thaliana* DCL1; At2, *A. thaliana* DCL2; Ca1, *C. albicans* EAK98282; Ca2, *C. albicans* XP\_717277; Ct1, *C. tropicalis* AAFN01000070; Ct2, *C. tropicalis* AAFN01000057; Cn1, *C. neoformans* XP\_569593.1; Cn2, *C. neoformans* XP\_569797.1; Dh1, *D. hansenii* XP\_457483.1; Dh2, *D. hansenii* XP\_457193.1; Hs, *H. sapiens* DICER1; Kl, *K. lactis* F2416; Kp1, *K. polysporus* 1045p1; Kp2, *K. polysporus* 455p11; Mg1, *M. grisiae* XP\_363615; Mg2, *M. grisiae* XP\_367242; Mg3, *M. grisiae* XP\_367242; Nc1, *N. crassa* Sms3; Nc2, *N. crassa* Dcl2; Nc3, *N. crassa* NCU01762; Sb1, *S. bayanus* 671p65; Sb2, *S. bayanus* 643p2; Sca1, *S. castellii* 696p6; Sca2, *S. castellii* 626p5; Sc, *S. cerevisiae* Rnt1; Sp1, *S. pombe* Pac1; Sp2, *S. pombe* Dcr1.

To search for a PAZ domain in the *S. pombe* Dcr1 protein, the full-length protein sequence was submitted as a query to the HHpred server, allowing 10 PSI-BLAST iterations and 1000 maximum hits (S25). All available standard HMM databases (pdb70\_3Sep09, pdb\_on\_hold\_3Sep09, scop70\_1.71, scop70\_1.75, cdd\_17Jul09, interpro\_16.2, pfamA\_23.0, smart\_17Jul09, panther\_4Mar08, tigrfam\_4Mar08, pirsf\_4Mar08, COG\_17Jul09, KOG\_17Jul09, CATH\_4Mar08, supfam\_4Mar08, pfam\_17Jul09, cd\_17Jul09, test56, test18) were searched, and the results realigned with the Maximum Accuracy (MAC) alignment algorithm. The search retrieved a family that included full-length Dicers (KOG id: KOG0701; E-value = 0) and a crystallized Dicer derived from *Giardia intestinalis* (PDB id: 2qvw/2ffl; E-value =  $1.1 \times 10^{-15}$ ), which both aligned to the *S. pombe* Dcr1 in regions that included their PAZ domains. The search also retrieved known PAZ-domain entries (CDD ids: cd02843, cd02844, cd02845, KOG id: KOG1042, Pfam id: PF02170; E-values =  $7.9 \times 10^{-5}$ ,  $2.3 \times 10^{-5}$ , 0.95, 19, 0.018, respectively), even though these entries lacked flanking domains to aid in the alignment. The same procedure was performed replacing the full-length Dcr1 query with a region between the first dsRNA-binding domain and the first RNaseIII domain (a.a. 628–914 of the *S. pombe* Dcr1 protein), which encompassed the putative PAZ region but no other known domains. This search also retrieved Dicer proteins and other known PAZ domain entries. Analogous searches did not provide evidence for a PAZ domain in *S. castellii* Dcr1p.

### mRNA sequencing and analysis

*Strand-specific mRNA-Seq.* Two biological replicates of DPB005 (WT), DPB007 ( $\Delta ago1$ ), and DPB009 ( $\Delta dcr1$ ) were grown in YPD to OD<sub>600</sub> 0.6–0.8. Total RNA isolated using hot phenol was treated with DNaseI (RiboPure-Yeast Kit, Ambion). Poly-(A)<sup>+</sup> mRNA was purified from 75  $\mu$ g total RNA using magnetic oligo-dT DynaBeads (Invitrogen) according to the manufacturer's instructions, and then fragmented by alkaline hydrolysis (S26). Trace amounts of synthetic 3'-

pCp[5'-<sup>32</sup>P]-labeled 26-nt and 32-nt RNA size markers were added to monitor the subsequent steps. RNA fragments (25–45 nt) were gel-purified and 3'-dephosphorylated in a 25 µl reaction containing 12.5 units T4 PNK (New England Biolabs) and MES-NaOH buffer (100 mM MES-NaOH pH 5.5, 10 mM MgCl<sub>2</sub>, 10 mM β-mercaptoethanol, 300 mM NaCl) for 6 h at 37°C. After phenol extraction and precipitation, RNA was ligated to pre-adenylated adaptor DNA as described (S16). Gel-purified ligation products were 5'-phosphorylated in a 14 µl reaction containing 15 units T4 PNK and PNK buffer for 30 min at 37°C. After phenol extraction and precipitation, RNA was ligated to a 5'-adaptor RNA, gel-purified, converted to cDNA, amplified, and sequenced as described (S16).

*Read processing.* The first 25 nt of each 36-nt read were isolated and collapsed into a non-redundant set of 25-nt sequences with occurrence counts (table S4). Sequences were mapped to the reference genome, allowing no mismatches and recovering all hits. Transcript-specific analysis of small-RNA data (e.g., Fig. 3A) was based on 22–23-nt reads from the Flag<sub>3</sub>-Ago1 IP dataset, unless indicated otherwise.

Exon annotations were downloaded from YGOB (introns less than 10 nt were considered sequencing errors and assigned as exons). Sense mRNA, antisense mRNA, and antisense small-RNA read counts were calculated individually for each gene by summing the hit-normalized reads mapping either to the 5'-half of the ORF (mRNA tags, half-ORF analysis) or across all of the ORF (small-RNA reads); a sequence contributed  $N$ -nt/25 reads to a gene ( $N$  = hit-normalized read number;  $nt$  = number of nt in the 25-nt sequence overlapping the ORF). In parallel, mRNA tag counts were also calculated across the entire ORF (full-ORF analysis, fig. S4).

For each gene, mRNA-Seq tag counts from biological replicates were averaged. Genes for which none of the three strains had an average tag count above 20 (half-ORF analysis) or above 30 (full-ORF analysis), and ORFs corresponding to Y' element fragments, were excluded from all analyses except in figures S4A and S4B. mRNA abundance was calculated by dividing tag counts by kb of mapped exon. mRNA-Seq tag counts from  $\Delta ago1$  were normalized to those of WT by first ranking genes based on the ratio of tags in  $\Delta ago1$  versus WT, and then multiplying the WT tag counts by a factor such that the median ranked gene had a transcript abundance ratio of 1. An analogous normalization procedure was also applied to  $\Delta dcr1$ . The final normalization factors were 0.8847 for WT, 1.0000 for  $\Delta ago1$ , and 0.8440 for  $\Delta dcr1$ . The same normalization factors were applied to the single-nucleotide-resolution mRNA-Seq plots for the Y' element consensus (Fig. 3B).

*Consensus Y' element of S. castellii.* An initial set of Y'-element fragments was obtained by extending and combining annotated Y'-element ORFs and Y'-element fragments manually identified in the course of annotating siRNA clusters. These fragments were assembled into a single contig using SeqMan Pro (DNASTAR Lasergene). The resulting majority sequence was used as a query for blastn against the genome (e-value cutoff  $10^{-10}$ , MegaBlast option). All additional Y' element fragments obtained from this search were added to the consensus, bringing to 32 the total number of unique contributing genomic fragments (fig. S5). mRNA tags and small-RNA reads were mapped to the consensus Y' element independently of the genome. Each library was initially mapped to the set of Y' element fragments, allowing no mismatches and recovering all hits. Mapped nucleotide positions with respect to fragments were converted into positions with respect to the consensus. Mapping data was normalized using the above factors and used to generate single-nucleotide-resolution plots of the consensus Y' element (Fig. 3B).

Y' element transcript and siRNA abundances were the sum of read and tag nucleotides across the region of interest divided by the appropriate length (25 nt for mRNA; 22 or 23 nt for siRNA).

*Comparing ORF-derived siRNA levels with transcript levels.* For each annotated protein-coding gene, mRNA tags and small-RNA reads mapping across its ORF were determined as above, except only uniquely mapping sequences were included. For each ORF, sense and antisense transcript abundances were estimated separately as the sum of tags from all six mRNA-Seq libraries (without normalization), and siRNA abundance was estimated as the sum of sense and antisense small-RNA reads. Genes with no unique mRNA-Seq tags mapping to the coding strand were excluded. Genes were ranked by total transcript abundance (sum of sense and antisense tags) and by inferred duplex abundance (minimum of sense and antisense tags). Genes with non-zero abundance were divided into three equally sized bins (high, mid, low). For inferred duplex analysis, genes with zero inferred duplex abundance (i.e., genes with sense tags but no antisense tags) formed a fourth bin.

*Transcripts corresponding to siRNA-generating loci.* For each siRNA cluster identified using the HMM, two transcripts—one on each strand—were initiated and assigned the coordinates of the cluster. Tags from  $\Delta dcr1$  mRNA-Seq libraries were used to extend cluster transcripts as follows. The transcript was extended 10 nt in the 5' direction if that 10-nt window had a tag density within 10-fold (above or below) of that of the initially assigned transcript. This process was iterated using the average tag density of the extended transcript. Once a window failing this criterion was reached, the transcript was terminated before the window. Then, the 3' end was also thus extended, beginning with the average tag density of the transcript that included the extended 5' end. Transcript extension was also tried first in the 3' then in the 5' direction; when the transcript ends disagreed between these two orders, the combination of 5' and 3' ends forming the largest transcript was used. The ends were then more finely mapped by identifying the first nucleotide upstream and last nucleotide downstream that corresponded to any tags (in  $\Delta dcr1$  mRNA-Seq libraries), with a maximum extension of 10 additional nucleotides. Coordinates of inferred transcripts are presented in table S3. Transcripts that had mRNA-Seq tags mapping to them but that did not overlap any previous annotations were annotated as *non-coding-siRNA-generating* genes (NCS, table S3).

Transcript abundance in each mRNA-Seq library and siRNA abundance were determined as with coding transcripts, with the following exceptions: intron annotations were ignored, and an average read cutoff of 15 tags (half-transcript analysis) or 20 tags (full-transcript analysis) in any strain was applied. Y'-element fragments were removed and replaced with the consensus, except in table S3.

*Protein-coding transcript extension and overlap.* Of 5693 annotated ORFs, 5297 (93%) had mRNA-Seq tags mapping to at least 70% of the ORF nucleotides (combining tags from all three strains) and were carried forward for further analysis. For each ORF, the 5' and 3' boundaries of the transcript were extended using the mRNA-Seq tags, requiring contiguous tag coverage outward from the ORF boundaries and assigning the revised 5' and 3' boundaries to the most distal nucleotides represented by these mRNA-Seq tags.

A gene pair was defined as a gene and its right neighbor (according to YGOB annotations). The 5297 ORFs were parsed into 4776 gene pairs, with the loss of pairs attributable mainly to genes located at the ends of contigs. The number of convergent overlapping transcripts giving rise to *DCR1*-dependent siRNAs was calculated comparing 22–23-nt reads from the Flag<sub>3</sub>-Ago1 input

and  $\Delta dcr1$  datasets. 467 convergent overlapping loci had uniquely mapping small RNA reads in the Flag<sub>3</sub>-Ago1 input dataset. The  $\Delta dcr1$  dataset was then used to adjust this number to account for the loci for which small RNAs represented *DCRI*-independent mRNA degradation intermediates. Because RNA degradation intermediates would be overrepresented in the  $\Delta dcr1$  small RNA dataset due to the absence of siRNAs, the  $\Delta dcr1$  dataset was normalized to the Flag<sub>3</sub>-Ago1 input dataset based on the number of rRNA and tRNA reads. Three normalized  $\Delta dcr1$  datasets were constructed from the complete dataset by random sampling without replacement. In these three datasets, a median of 30 convergent overlapping loci had uniquely mapping  $\Delta dcr1$  small RNA reads, which indicated that at least 437 convergent overlapping loci (43%) gave rise to *DCRI*-dependent uniquely mapping siRNAs.

To compare overlapping transcripts between *S. castellii* and *S. cerevisiae*, a list of gene pairs with opposite and overlapping transcripts in *S. cerevisiae* was downloaded from <http://www.yale.edu/snyder/> (S27). The genes comprising these 828 unique gene pairs were mapped to their corresponding *S. castellii* genes based on YGOB annotations. 398 pairs corresponded to annotated convergent gene pairs in *S. castellii*. These pairs were cross-referenced with the list of *S. castellii* overlapping convergent gene pairs to determine the number producing overlapping transcripts in both species. Of the convergent gene pairs syntenic between these two genomes and reported to generate overlapping mRNAs in *S. cerevisiae* (S27), 84% generated overlapping mRNAs in *S. castellii*.

*S. cerevisiae* mRNA-Seq analysis. Strand-specific mRNA-Seq data from *S. cerevisiae* (S26) was downloaded from the Gene Expression Omnibus (samples GSM346117 and GSM346118) and processed as for *S. castellii*. Telomere annotations (TEL16L, TEL16R, TEL12L, and TEL12R) were downloaded from SGD, and hit-normalized tag counts were used to plot the abundance of mRNA-Seq tags at single-nucleotide resolution (i.e. tags contributed to counts along their entire length). To analyze mRNA-Seq tags mapping to a consensus Ty1 element, the 28 full-length Ty1 elements in the S288C genome sequence (identified using Ty1H3 as a query for blastn against the genome) were aligned using SeqMan Pro (DNASTAR Lasergene). mRNA-Seq tags matching the consensus element were analyzed as for the consensus Y' element of *S. castellii*, except tag counts were divided by 28 to obtain the average number of tags per full-length element at each position.

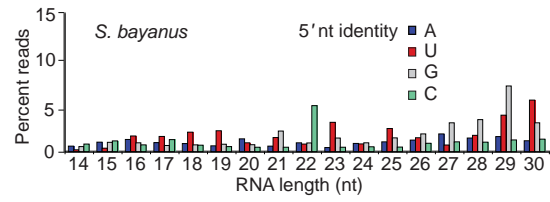

**Figure S1.** Analysis of small-RNA library from *S. bayanus* MCYC623. Length distribution of genome-matching reads (as percent of reads that do not match tRNA or rRNA) representing small RNAs with the indicated 5' nucleotide (nt). Reads matching tRNAs and rRNAs were excluded.

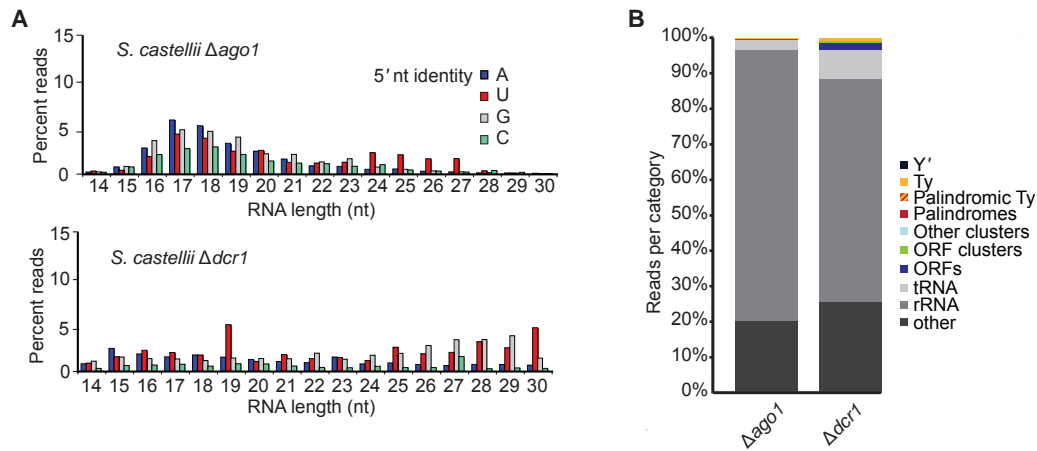

**Figure S2.** Analysis of small-RNA libraries from RNAi-mutant strains. **(A)** Length distributions of genome-matching reads (as percent of reads that do not match tRNA or rRNA) representing small RNAs with the indicated 5' nucleotide (nt). Reads matching tRNAs and rRNAs were excluded. **(B)** Classification of 21–23-nt reads based on genome annotations and alignments.

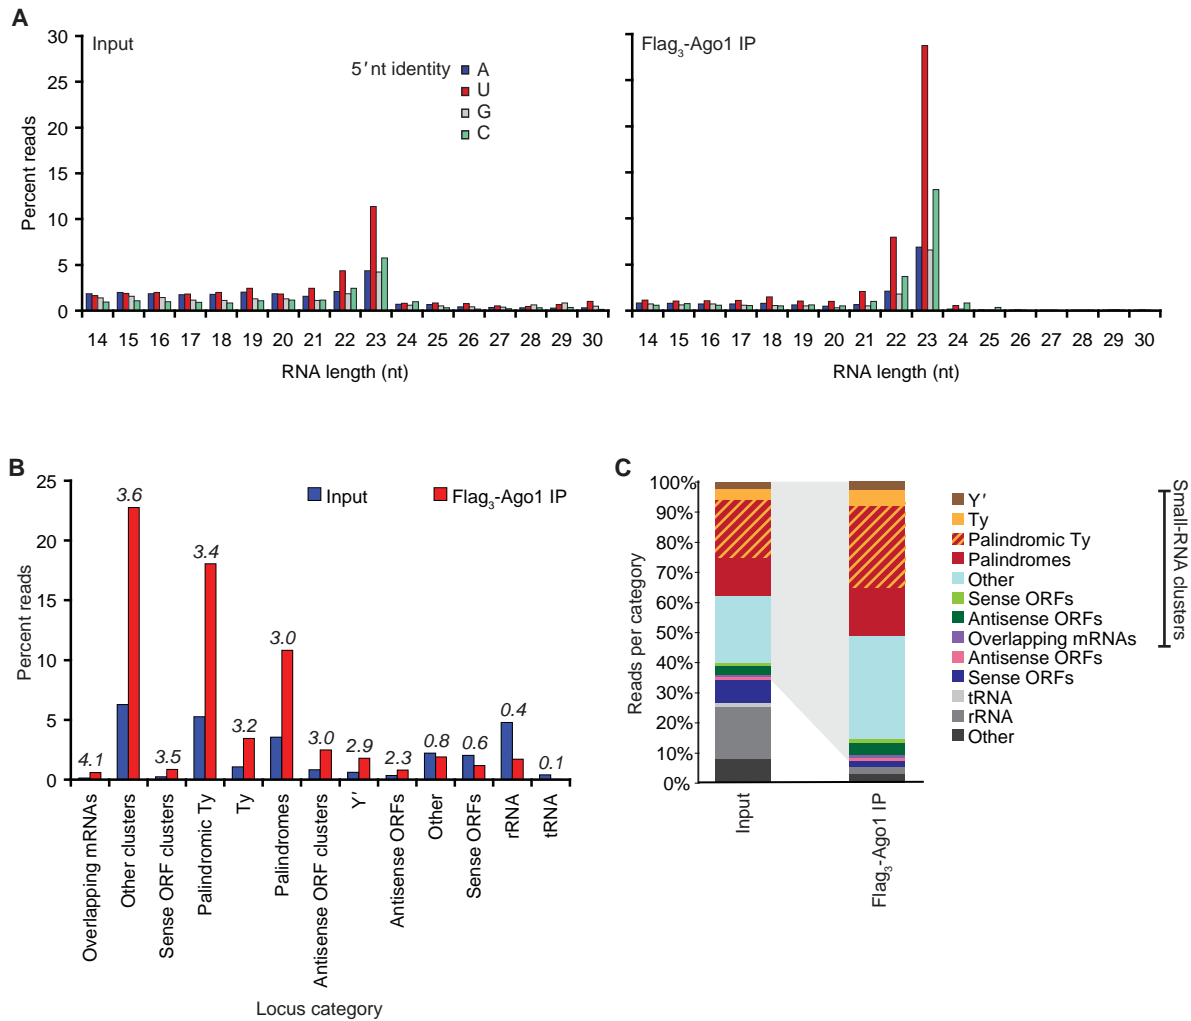

**Figure S3.** Sequencing of Ago1-associated small RNAs. **(A)** Length distribution of genome-matching sequencing reads representing small RNAs with the indicated 5' nucleotide. Reads matching rRNA and tRNA are excluded. **(B)** Enrichment analysis of 22–23-nt reads based on genome annotation and alignments of their mapped loci. Italicized numbers above bars represent fold-enrichment calculated as (% of total reads in IP)/(% of total reads in Input). **(C)** Classification of 22–23-nt reads based on genome annotation and alignments of their mapped loci, considering those that map to clusters in a pattern suggestive of siRNAs separately from those that do not. Gray shading indicates the fraction of small RNAs considered to be siRNAs.



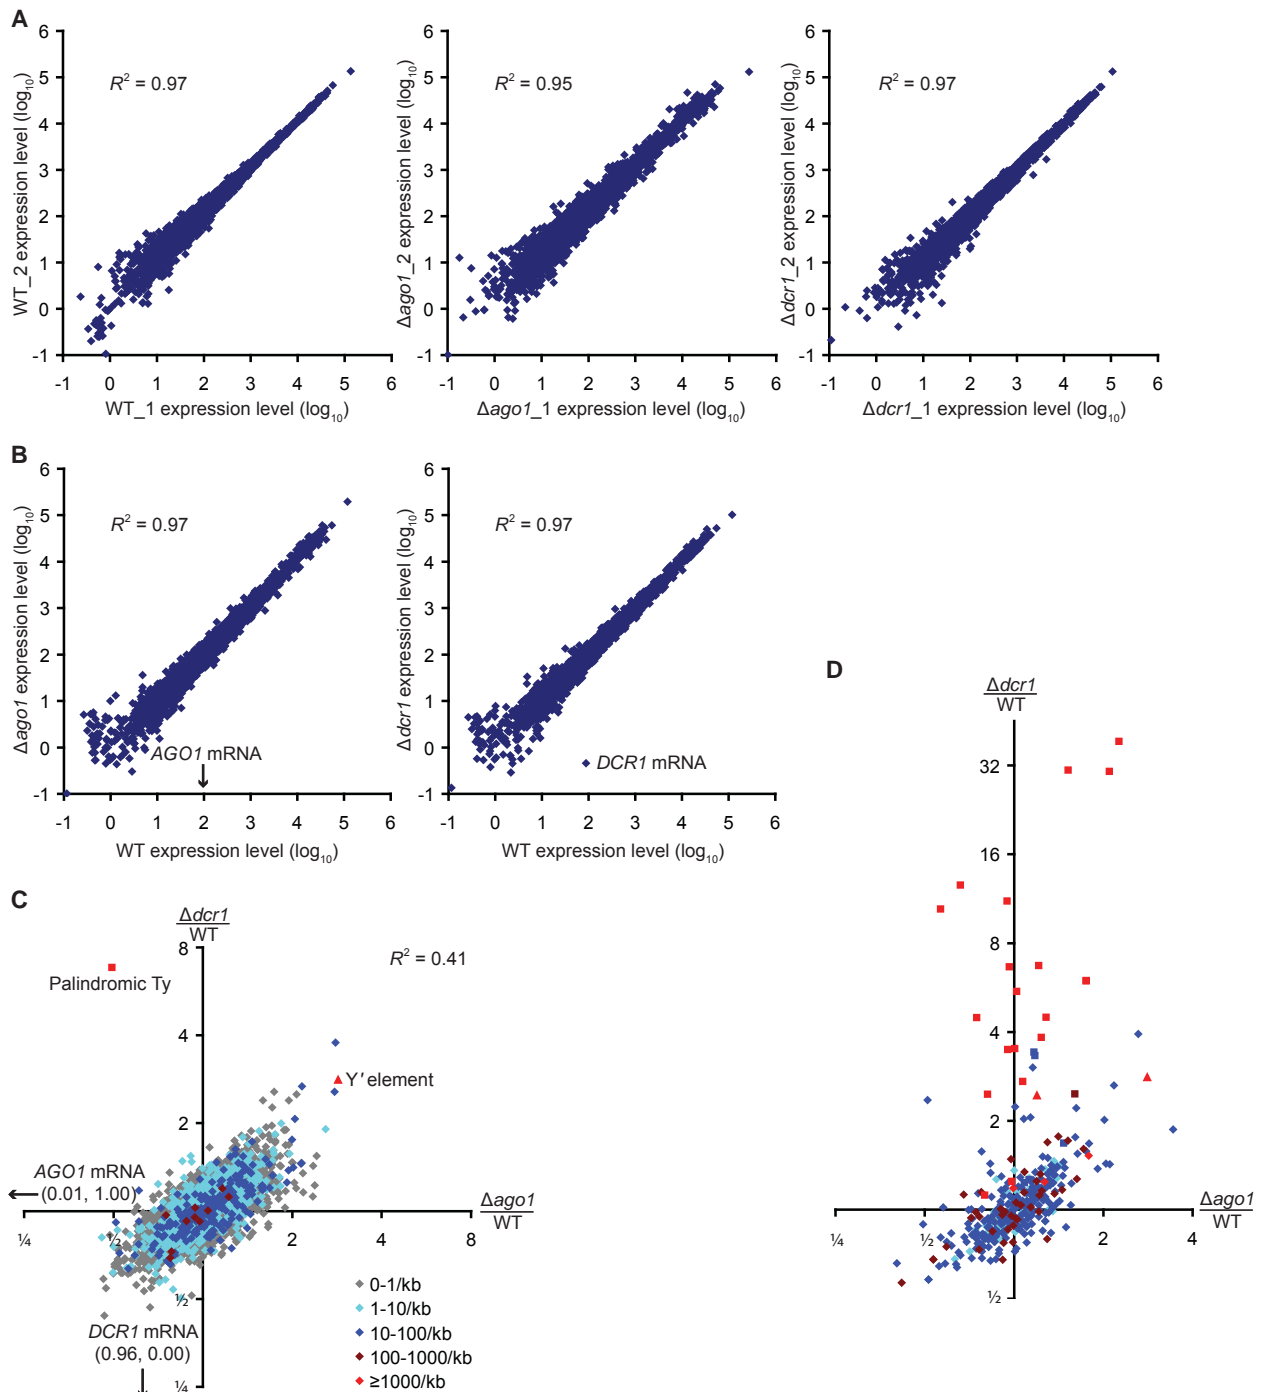

**Figure S4.** mRNA-Seq analysis of wild-type and RNAi-mutant strains. **(A)** Correlation in transcript abundance between biological replicates. The number of tags mapping to the 5' half of each annotated ORF was used to estimate the abundance of full-length transcripts. Expression level was calculated as tags per kilobase of coding exon. **(B)** Correlation in transcript abundance between wild-type and RNAi-mutant strains. Plots are as in (A). AGO1 mRNA had 96.77 tags/kb and 0 tags/kb in WT and  $\Delta ago1$  strains, respectively. **(C)** Plot is as in Figure 3A, except that transcript abundance was calculated using tags across the entire ORF. **(D)** Plot is as in Figure 3C, except that transcript abundance was calculated using tags across the entire transcript.

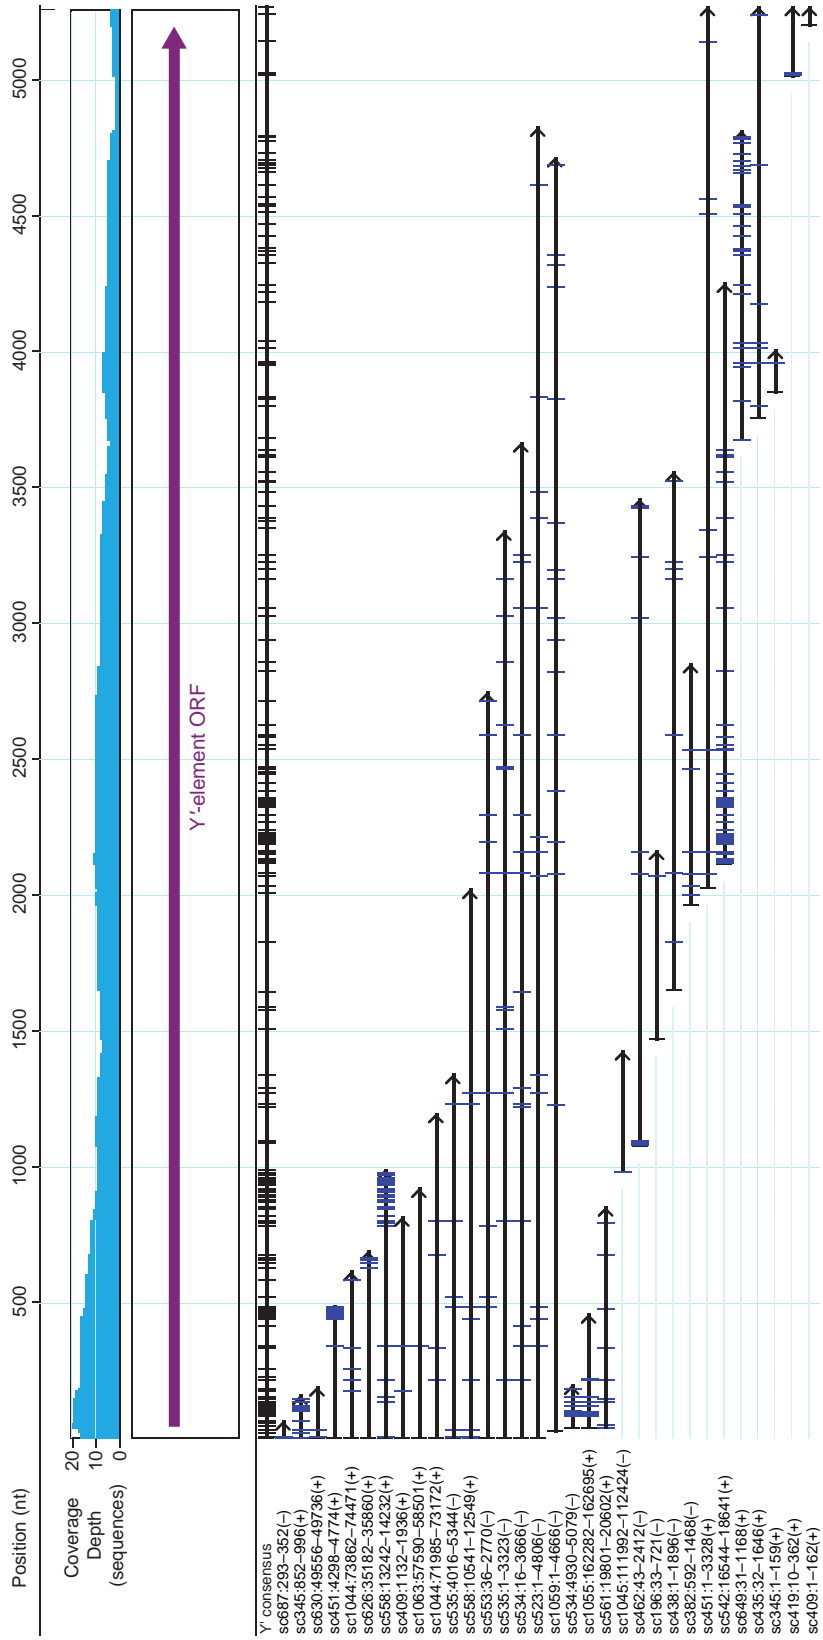

**Figure S5.** Assembly of a *S. castellii* Y'-element consensus sequence. Y'-element fragments were assembled into a single consensus sequence as described in Materials and Methods. Vertical bars represent single-nucleotide polymorphisms with respect to the majority sequence, many of which fell at the ends of contigs and are presumed to include sequencing errors.

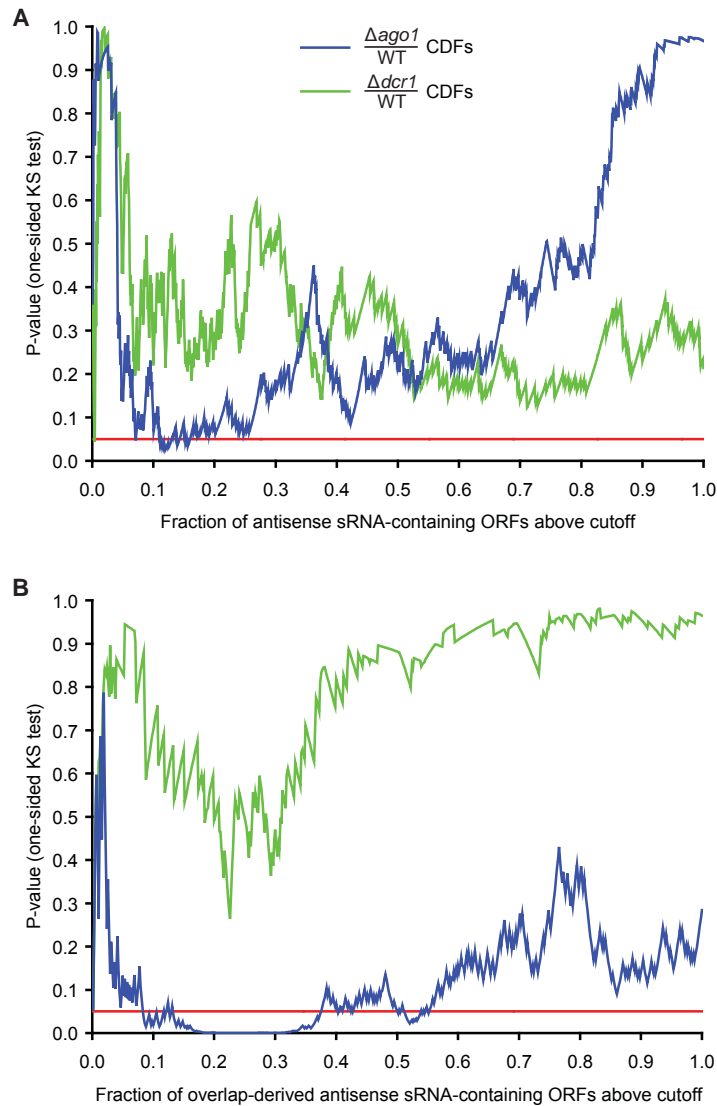

**Figure S6.** Impact of siRNAs on ORF-containing transcripts. **(A)** Statistical analysis of the impact of small RNAs (sRNAs) mapping antisense to annotated ORFs. ORFs were sorted descending by antisense sRNAs per kb and the significance of transcript down regulation for the ORFs with greater numbers of small RNAs was calculated for the full range of cutoff values. A one-sided KS test was used to compare the distribution of  $\Delta ago1/WT$  (blue) or  $\Delta dcr1/WT$  (green) transcript ratios for ORFs above and below each cutoff. Plotted are the resulting P-values as a function of the cutoff (expressed as the fraction of all antisense-sRNA-containing ORFs included above the cutoff). The red line indicates the  $P = 0.05$  significance cutoff. **(B)** Statistical analysis of the impact of sRNAs generated by overlapping convergent gene pairs. ORFs were sorted descending by overlapping-transcript-derived antisense sRNAs/kb and analyzed as in (A).

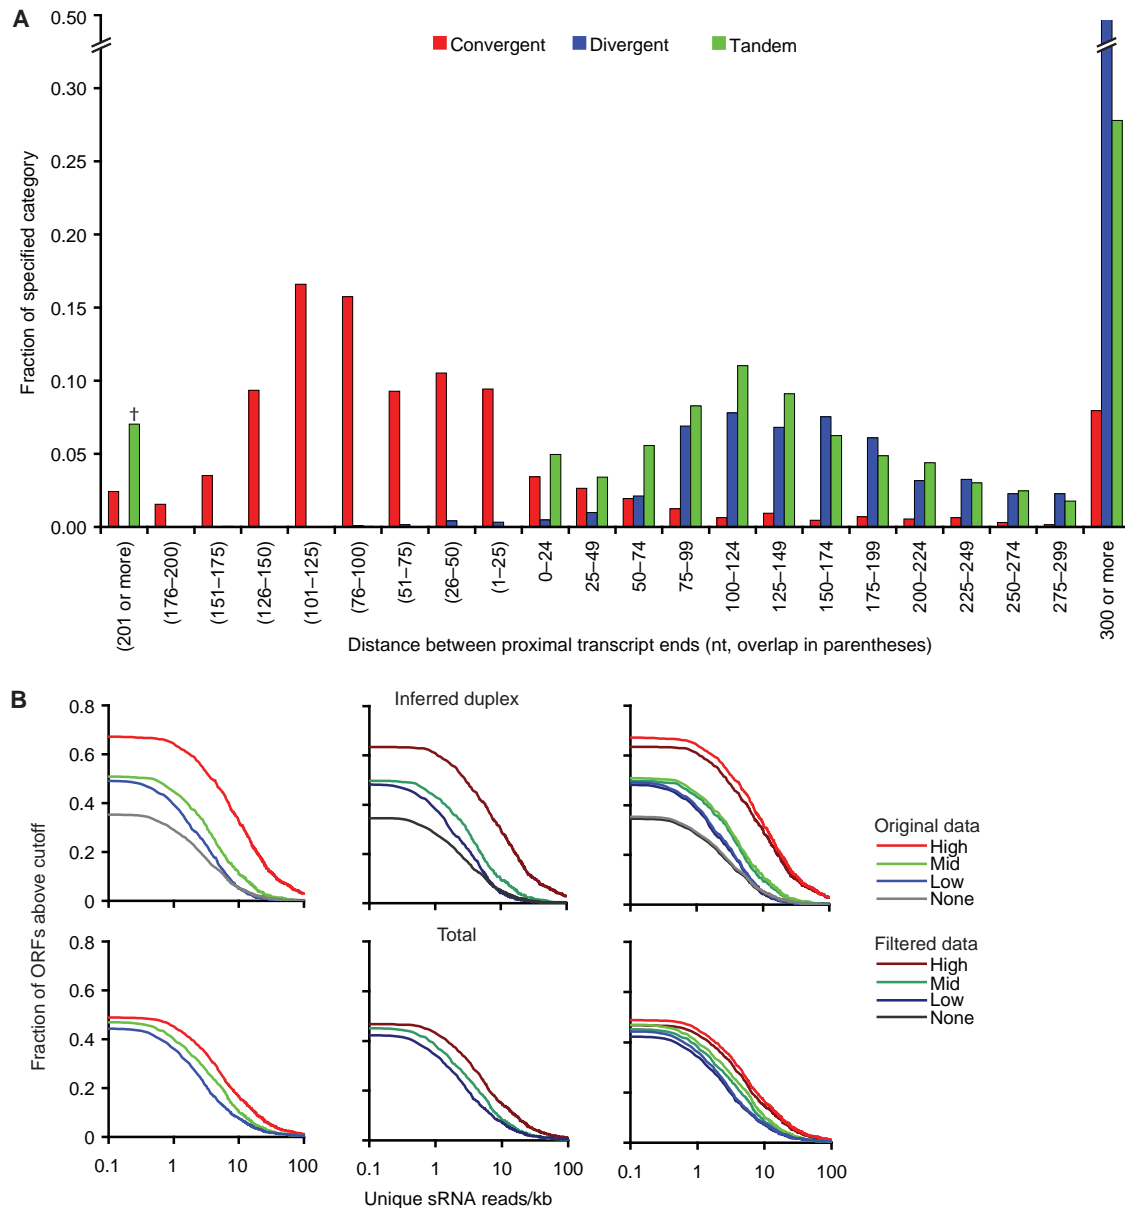

**Figure S7.** Gene-pair organization and overlap in *S. castelli*. **(A)** Distribution of gene-pair inter-transcript distances. Gene pairs were binned by the distance between 3'-ends (convergent), 5'-ends (divergent), or 3'-end of the upstream gene and 5'-end of the downstream gene (tandem). Plotted is the fraction of gene pairs of a given orientation category that fall within each bin. † For overlapping tandem gene pairs, transcript ends for both genes represent the 5' and 3' ends of the contiguous signal observed by mRNA-Seq. Therefore, tandem gene pairs are depicted as overlapping across their length. **(B)** Correlation between transcript abundance and small RNA density for annotated ORFs. ORFs were binned according to inferred duplex abundance (estimated as the abundance of the limiting strand; top) or total transcript abundance (sum of sense and antisense tags; bottom). Plotted is the fraction of ORFs within a given bin that have at least as many uniquely matching small RNA reads (on either strand) as the x-axis value. As expected if siRNAs in coding sequences derived from dsRNA precursors formed by sense-antisense transcript pairs, the abundance of ORF siRNAs correlated with the abundance of the inferred duplex. Filtered data excludes all convergent overlapping gene pairs that give rise to small RNAs in the overlap region.

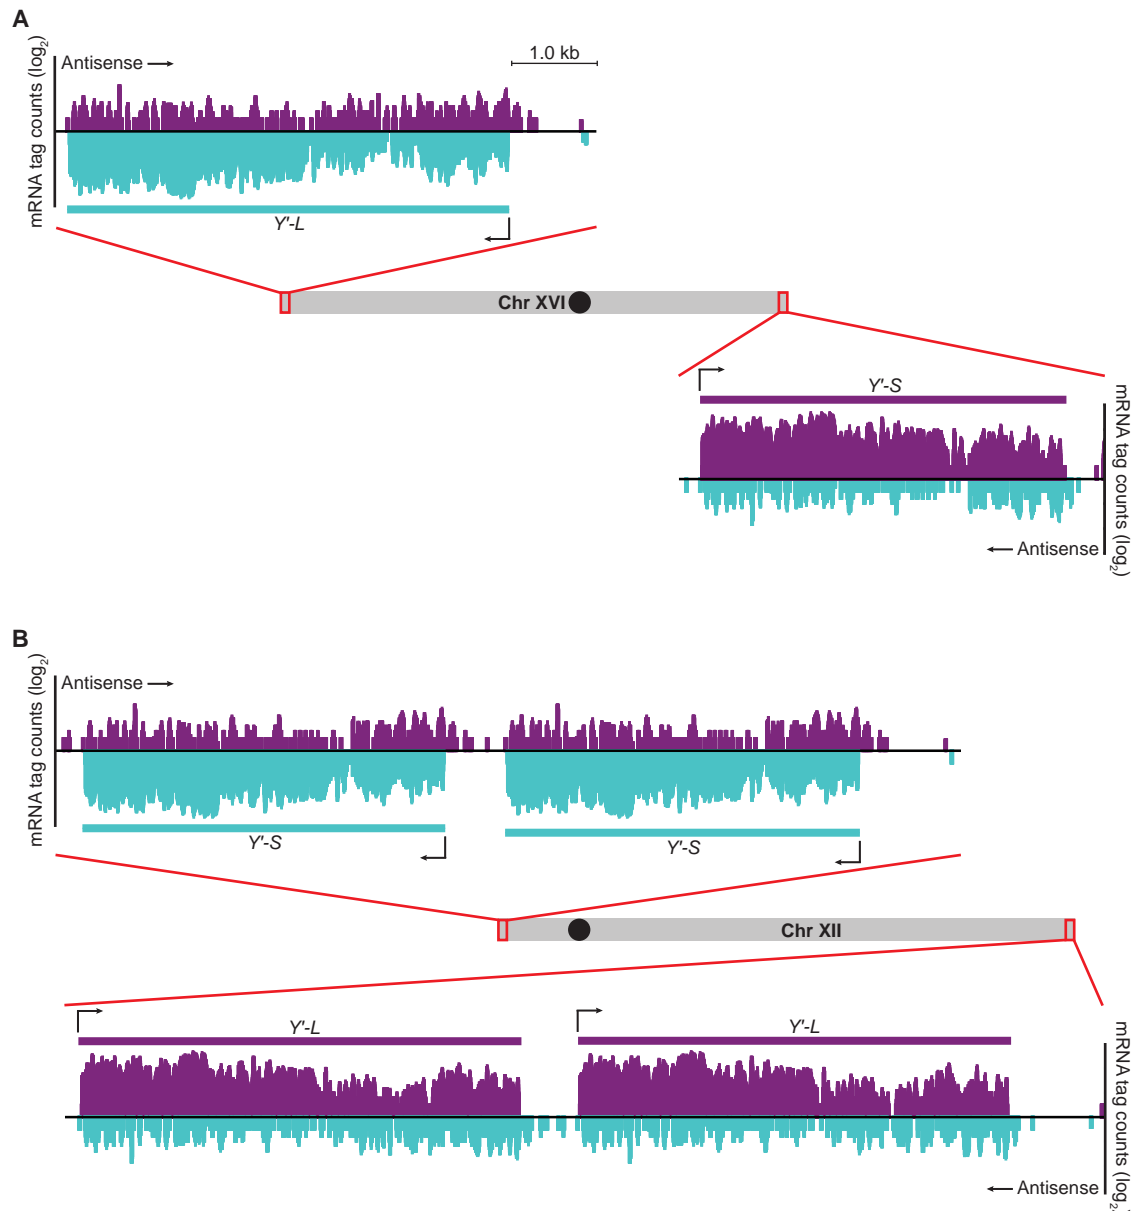

**Figure S8.** mRNA-Seq analysis of the *S. cerevisiae* Y' elements. **(A)** Transcripts mapping to chromosome XVI subteleres. mRNA-Seq tags were mapped to the reference genome. Tags mapping to the subteleromic regions of chromosome XVI are shown, with tags contributing to the counts along their entire length. Positions of the vertical axes correspond to the ends of the chromosome. Y'-L and Y'-S represent the inferred genes corresponding to the long and short isoforms of *S. cerevisiae* Y' elements, respectively. In *S. cerevisiae*, the telomeres are transcriptionally silenced by Sir2-dependent heterochromatin but still give rise to low levels of cryptic transcripts that are rapidly degraded by the TRAMP and exosome complexes (S28). The previously characterized *S. cerevisiae* cryptic telomeric transcripts are ~6.5 kb in length, and begin near chromosome ends and run antisense through the entire Y'-element ORF. The antisense reads we detected across *S. cerevisiae* subteleromic regions may represent these previously identified cryptic transcripts. **(B)** Transcripts mapping to chromosome XII subteleres. Plots are as in (A).

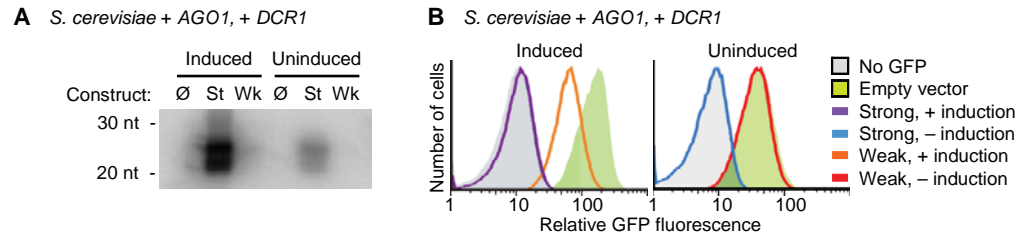

**Figure S9.** Reconstituting RNAi in *S. cerevisiae*. **(A)** Northern blot for siRNAs antisense to GFP in a *S. cerevisiae* strain expressing *S. castellii* *AGO1*, *DCR1*, and either no silencing construct ( $\emptyset$ ), an integrated strong silencing construct (St), or an integrated weak silencing construct (Wk). Cells were induced in SC media with galactose and raffinose or uninduced in SC media with glucose. **(B)** FACS histograms of GFP fluorescence in *S. cerevisiae* expressing *S. castellii* *AGO1* and *DCR1* and the indicated silencing constructs. The same cultures were used here for sorting as for RNA collection in (A). In principle the siRNAs and silencing observed under uninduced conditions could be due to leaky expression from the *GAL1* promoter, but these effects are probably attributable to constitutive antisense transcription from a downstream promoter.

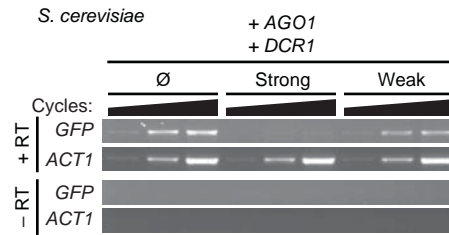

**Figure S10.** Analysis of *GFP* mRNA in reconstituted RNAi in *S. cerevisiae*. Aliquots from RT-PCR reactions were removed after increasing numbers of PCR cycles (*GFP*: 28, 32, 36; *ACT1*: 24, 28, 32) and visualized by ethidium bromide staining.

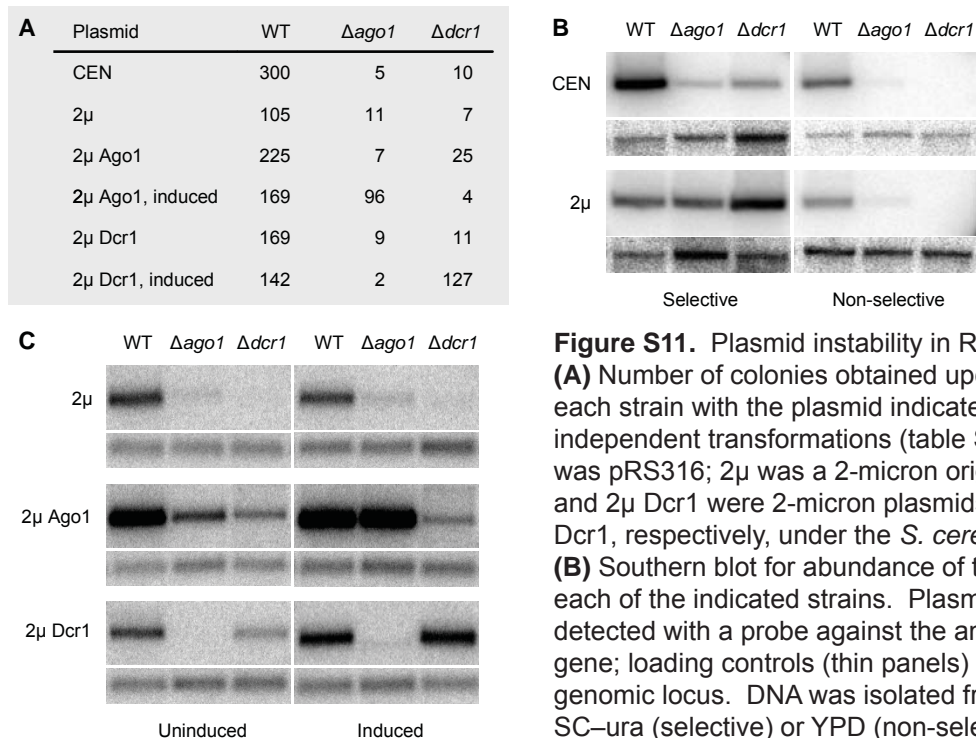

**Figure S11.** Plasmid instability in RNAi mutants. **(A)** Number of colonies obtained upon transformation of each strain with the plasmid indicated, sum of three independent transformations (table S6). The CEN plasmid was pRS316; 2 $\mu$  was a 2-micron origin plasmid; 2 $\mu$  Ago1 and 2 $\mu$  Dcr1 were 2-micron plasmids expressing Ago1 or Dcr1, respectively, under the *S. cerevisiae* GAL1 promoter. **(B)** Southern blot for abundance of the indicated plasmid in each of the indicated strains. Plasmids (CEN, 2 $\mu$ ) were detected with a probe against the ampicillin-resistance gene; loading controls (thin panels) were probed for a genomic locus. DNA was isolated from cells grown in SC-ura (selective) or YPD (non-selective). **(C)** Southern blot probed as in (B) monitoring rescue of plasmid maintenance phenotype using DNA isolated from cells grown in YPD (uninduced) or YP-galactose (induced).

$\Delta ago1$  and  $\Delta dcr1$  mutants yielded fewer colonies upon plasmid transformation than did wild-type *S. castellii* (fig. S11A, top two rows). This effect was observed for CEN plasmids (which contained an *S. cerevisiae* centromere sequence and an *S. cerevisiae* chromosomal origin of replication) as well as 2-micron plasmids (which contained the origin of the *S. cerevisiae* endogenous 2-micron circle but no centromere sequence). To distinguish whether this effect reflected a defect in plasmid transformation (plasmid entering the cell) or plasmid maintenance (propagation of the plasmid after entering the cell), we attempted to rescue the defect by transforming wild-type,  $\Delta ago1$ , and  $\Delta dcr1$  strains with plasmids expressing either Ago1 or Dcr1 from an inducible promoter. If the mutant strains were defective in transformation, then these Ago1 and Dcr1 expression plasmids would not enter the cell and thus could not rescue the mutant phenotype. Alternatively, if the mutant strains were defective in plasmid maintenance, then these plasmids would enter the cell, and expression of plasmid-borne Ago1 or Dcr1 in the cognate mutant could rescue maintenance of the expression plasmid itself. When the  $\Delta ago1$  mutant was transformed with the Ago1-expression plasmid and the cells were plated on inducing media, wild-type numbers of colonies were obtained. The same was observed for the  $\Delta dcr1$  mutant transformed with the Dcr1-expression plasmid. This rescue was not observed with the non-cognate plasmids or when expression was not induced (fig. S11A), thereby demonstrating the specificity of the rescue. These results show that RNAi is required for maintenance of *S. cerevisiae* plasmids in *S. castellii*.

We then used Southern blots to monitor plasmid levels. For the CEN plasmid,  $\Delta ago1$  and  $\Delta dcr1$  mutants carried, on average, fewer plasmids per cell relative to wild-type cells, even when grown in selective media (fig. S11B, top). For the 2-micron plasmid,  $\Delta ago1$  and  $\Delta dcr1$  mutants maintained the plasmid at wild-type abundance in selective media, although growth was considerably slower. When allowed to lose plasmid by growth in rich, non-selective media, the mutants lost more plasmid than the wild-type cells did (fig. S11B, bottom). Consistent with the rescue observed when counting colonies (fig. S11A), expressing the relevant protein from the plasmid being monitored rescued the plasmid-maintenance phenotype (fig. S11C). Partial rescue was observed without induction due to leaky expression, but full rescue required induction.



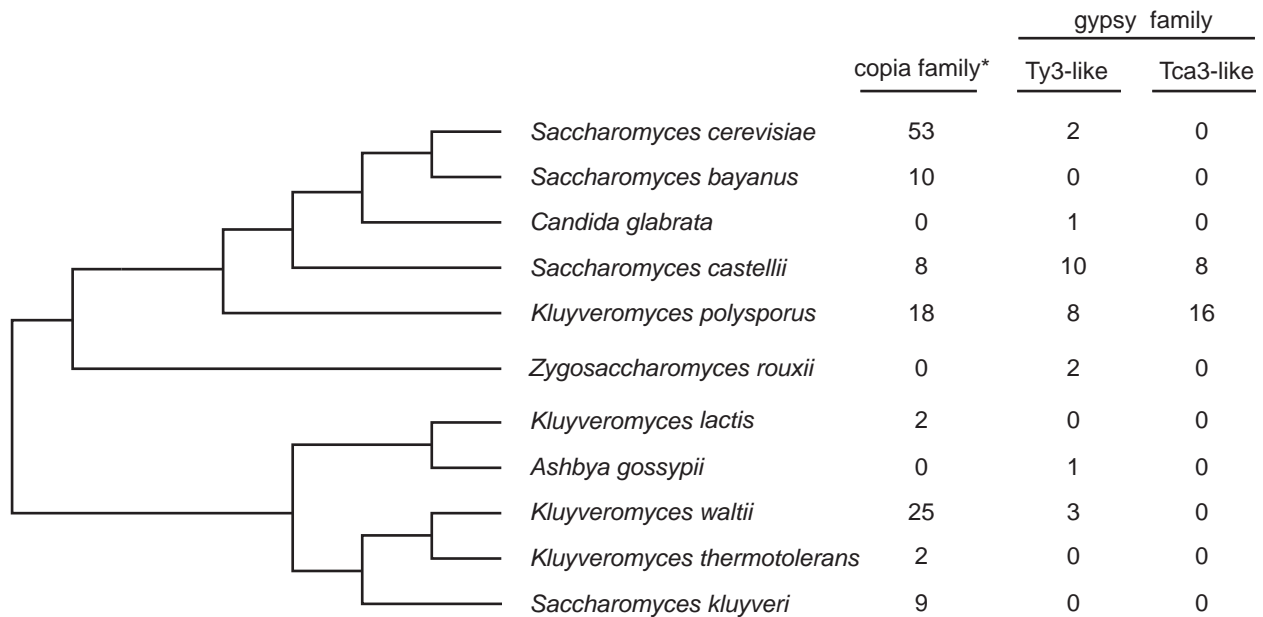

\* Ty1, Ty2, Ty4, Ty5

**Figure S12.** Approximate copy numbers of retroelements in budding yeast species. Copy numbers were estimated by TBLASTN searches using the Gag-Pol polyprotein as a search query. Intact genes and pseudogenes were counted, but not solo LTRs. *S. castellii* and *K. polysporus* have many more Ty3/gypsy elements (18 and 24 elements, respectively) than those budding yeast species that have lost the RNAi pathway (0–3 elements). Most notably, a subfamily of gypsy elements more similar to *C. albicans* Tca3 (S29) than to *S. cerevisiae* Ty3 is found exclusively in species that have retained the RNAi pathway: *S. castellii* and *K. polysporus*, as well as several *Candida* species. The two gypsy subfamilies have been proposed to have different mechanisms for priming minus-strand RNA synthesis (30). As in *C. albicans*, many of the members of the gypsy families in *S. castellii* and *K. polysporus* appear to be structurally rearranged. It is possible that selection has favored the retention of these structures as templates for defensive siRNA production.

**Table S1.** Analysis of small-RNA libraries. Read counts were normalized to the number of genomic matches and separated into different categories based on genome annotations and alignments. Numbers in parenthesis are percent of reads compared to number of genome matching reads of either all sequence reads or only reads of 21–23-mers.

| Annotation                  | <i>S. castellii</i> |                |                            | <i>K. polysporus</i>       |                 |                | <i>C. albicans</i> |                 |                 | <i>S. cerevisiae</i> |                 |                |
|-----------------------------|---------------------|----------------|----------------------------|----------------------------|-----------------|----------------|--------------------|-----------------|-----------------|----------------------|-----------------|----------------|
|                             | all reads           | wild-type      | $\Delta ago1$<br>all reads | $\Delta dcr1$<br>all reads | all reads       | 21–23-mers     | all reads          | 21–23-mers      | all reads       | 21–23-mers           | all reads       | 21–23-mers     |
| Ty retrotransposons         |                     |                |                            |                            |                 |                |                    |                 |                 |                      |                 |                |
| Palindromic                 | 27984.0 (12.1)      | 24419.2(22.5)  | 81.0 (0.1)                 | 11.3 (<0.1)                | 5891.5 (0.7)    | 5020.2 (1.6)   | 0.0 (0.0)          | 0.0 (0.0)       | 0.0 (0.0)       | 0.0 (0.0)            | 0.0 (0.0)       | 0.0 (0.0)      |
| Non-palindromic             | 18949.8 (8.2)       | 16223.0(14.9)  | 271.1 (0.3)                | 9662.6 (0.8)               | 98666.5 (11.2)  | 79859.1 (25.5) | 881.5 (0.1)        | 677.0 (0.3)     | 52.8 (<0.1)     | 3.9 (<0.1)           | 52.8 (<0.1)     | 3.9 (<0.1)     |
| Y'-elements                 | 4942.9 (2.1)        | 4172.5 (3.8)   | 9.0 (0.0)                  | 50.0 (<0.1)                | 67354.8 (7.6)   | 56305.0 (18.0) | –                  | –               | 10.8 (<0.1)     | 1.0 (<0.1)           | 10.8 (<0.1)     | 1.0 (<0.1)     |
| Zorro3                      | –                   | –              | –                          | –                          | –               | –              | 4809.5 (0.4)       | 3416.0 (1.6)    | –               | –                    | –               | –              |
| CTA2 family                 | –                   | –              | –                          | –                          | –               | –              | 8991.9 (0.8)       | 6848.9 (3.1)    | –               | –                    | –               | –              |
| LPF family                  | –                   | –              | –                          | –                          | –               | –              | 2198.5 (0.2)       | 1604.0 (0.7)    | –               | –                    | –               | –              |
| Other transposon homology*  | –                   | –              | –                          | –                          | –               | –              | 1719.1 (0.1)       | 1226.0 (0.6)    | –               | –                    | –               | –              |
| Other palindromes           | 18322.2 (7.9)       | 16356.7(15.0)  | 51.0 (0.1)                 | 23.5 (<0.1)                | 20503.5 (2.3)   | 17039.3 (5.4)  | –                  | –               | –               | –                    | –               | –              |
| ORF clusters                | 1860.2 (0.8)        | 1583.9 (1.5)   | 8.7 (<0.1)                 | 45.3 (<0.1)                | 11114.0 (1.3)   | 9170.6 (2.9)   | 2972.6 (0.25)      | 2080.1 (1.0)    | –               | –                    | –               | –              |
| Other siRNA clusters        | 15191.2 (6.5)       | 13267.8(12.2)  | 87.0 (<0.1)                | 6977.3 (0.6)               | 39390.4 (4.5)   | 31612.7 (10.1) | 8487.0 (0.7)       | 5367.5 (2.5)    | –               | –                    | –               | –              |
| ORFs                        | 2829.4 (1.2)        | 1971.5 (1.8)   | 123.7 (0.1)                | 23616.4 (1.9)              | 9094.7 (1.0)    | 5568.7 (1.8)   | 19253.8 (1.6)      | 8131.6 (3.7)    | 3783.1 (1.0)    | 700.2 (1.0)          | 3783.1 (1.0)    | 700.2 (1.0)    |
| Pseudogenes                 | n.d.                | n.d.           | n.d.                       | n.d.                       | 73.4 (<0.1)     | 48.0 (<0.1)    | n.d.               | n.d.            | 5.2 (<0.1)      | 2.0 (<0.1)           | 5.2 (<0.1)      | 2.0 (<0.1)     |
| Centromeres                 | n.d.                | n.d.           | n.d.                       | n.d.                       | n.d.            | n.d.           | 15.0 (<0.1)        | 0.0 (0.0)       | 0.0 (0.0)       | 0.0 (0.0)            | 0.0 (0.0)       | 0.0 (0.0)      |
| Telomeres                   | n.d.                | n.d.           | n.d.                       | n.d.                       | 2284.2 (0.3)    | 1817.5 (0.6)   | n.d.               | n.d.            | 0.2 (<0.1)      | 0.0 (0.0)            | 0.2 (<0.1)      | 0.0 (0.0)      |
| Non-protein coding RNAs     |                     |                |                            |                            |                 |                |                    |                 |                 |                      |                 |                |
| rRNA                        | 103905.9 (44.7)     | 19039.8(17.5)  | 74687.1 (76.2)             | 746407.5 (62.7)            | 525501.2 (59.6) | 80098.5 (25.6) | 990056.6 (83.2)    | 148932.0 (68.0) | 310004.5 (84.9) | 63278.7 (87.4)       | 310004.5 (84.9) | 63278.7 (87.4) |
| tRNA                        | 3550.4 (1.5)        | 565.2 (0.5)    | 2635.4 (2.7)               | 98132.5 (8.2)              | 63408.8 (7.2)   | 8267.0 (2.6)   | 39074.3 (3.3)      | 6225.0 (2.8)    | 38398.3 (10.5)  | 6140.0 (8.5)         | 38398.3 (10.5)  | 6140.0 (8.5)   |
| Other ncRNA                 | n.d.                | n.d.           | n.d.                       | n.d.                       | n.d.            | n.d.           | 30297.8 (2.5)      | 6309.0 (2.9)    | 2339.4 (0.6)    | 431.0 (0.6)          | 2339.4 (0.6)    | 431.0 (0.6)    |
| Other                       | 34680.1 (14.9)      | 11169.5(10.3)  | 19997.0 (20.4)             | 305659.6 (25.7)            | 30565.8 (3.5)   | 13249.4 (4.2)  | 80747.5 (6.8)      | 28135.0 (12.8)  | 10691.7 (2.9)   | 1869.2 (2.6)         | 10691.7 (2.9)   | 1869.2 (2.6)   |
| Total genome-matching reads | 232226.0 (100)      | 108769.0 (100) | 97951.0 (100)              | 1190586.0 (100)            | 881041.0 (100)  | 312884.0 (100) | 1189505.0 (100)    | 218952.0 (100)  | 365286.0 (100)  | 72426.0 (100)        | 365286.0 (100)  | 72426.0 (100)  |
| Total reads                 | 510234              | 528020         | 4265687                    | 1777358                    | 3334405         | 1227275        |                    |                 |                 |                      |                 |                |

\* Hypothetical protein CaO19.7545, potential SWIM zinc finger protein very similar to CaP19.4241, C terminus is same as Rel-associated hypothetical protein, MULE transposase domain; Hypothetical protein CaO19.6608, weak similarity to *C. albicans* Ctr2 transposase

n.d. - not determined  
– - not applicable

**Table S2.** Analysis of small-RNA libraries from input and Flag<sub>3</sub>-Ago1 IP datasets. Read counts were normalized to the number of genomic matches and separated into different categories based on genome annotations and alignments. Numbers in parentheses are percent of reads compared to number of genome matching reads of either all sequence reads or only reads of 22–23-mers.

|                             | Input     |        |            |        | Flag <sub>3</sub> -Ago1 IP |        |            |        |
|-----------------------------|-----------|--------|------------|--------|----------------------------|--------|------------|--------|
|                             | all reads |        | 22–23-mers |        | all reads                  |        | 22–23-mers |        |
| Ty retrotransposons         |           |        |            |        |                            |        |            |        |
| Non-palindromic Ty          | 23892.9   | (1.7)  | 15310.0    | (3.8)  | 53793.7                    | (4.5)  | 40818.3    | (5.2)  |
| Palindromic Ty              | 110728.9  | (7.7)  | 75986.0    | (19.0) | 281476.6                   | (23.7) | 213975.9   | (27.2) |
| Y' elements                 | 14058.9   | (1.0)  | 9037.7     | (2.3)  | 29293.5                    | (2.5)  | 21335.9    | (2.7)  |
| Other palindromes           | 70149.7   | (4.9)  | 51205.4    | (12.8) | 164269.9                   | (13.9) | 128153.5   | (16.3) |
| ORF clusters                |           |        |            |        |                            |        |            |        |
| Sense ORF clusters          | 7172.8    | (0.5)  | 3530.2     | (0.9)  | 13191.2                    | (1.1)  | 10197.4    | (1.3)  |
| Antisense ORF clusters      | 17705.9   | (1.2)  | 11774.5    | (2.9)  | 38322.0                    | (3.2)  | 29345.9    | (3.7)  |
| Overlapping mRNAs           | 4958.4    | (0.3)  | 2106.5     | (0.5)  | 9251.8                     | (0.8)  | 7028.0     | (0.9)  |
| Other siRNA clusters        | 135377.1  | (9.4)  | 90559.8    | (22.6) | 368810.2                   | (31.1) | 269707.6   | (34.3) |
| Open reading frames         |           |        |            |        |                            |        |            |        |
| Sense ORFs                  | 244127.2  | (16.9) | 29220.9    | (7.3)  | 49693.8                    | (4.2)  | 13907.4    | (1.8)  |
| Antisense ORFs              | 20280.8   | (1.4)  | 5033.7     | (1.3)  | 18576.6                    | (1.6)  | 9380.3     | (1.2)  |
| tRNA                        | 66699.1   | (4.6)  | 5629.7     | (1.4)  | 3573.7                     | (0.3)  | 244.4      | (<0.1) |
| rRNA                        | 479478.7  | (33.3) | 68866.7    | (17.2) | 101753.5                   | (8.6)  | 20168.2    | (2.6)  |
| Other                       | 245917.5  | (17.1) | 32093.0    | (8.0)  | 53441.5                    | (4.5)  | 22434.4    | (2.9)  |
| Total genome-matching reads | 1440548   | (100)  | 400354     | (100)  | 1185448                    | (100)  | 786697     | (100)  |
| Total reads                 | 4310251   |        |            |        | 4102562                    |        |            |        |

**Table S3.** siRNA-producing loci and their transcripts. Start and end represent the inferred 5' and 3' ends of the transcript, respectively. Coverage is the percentage of nucleotides in the transcript (excluding nucleotides added during fine mapping) that are represented by mRNA-Seq tags.

| Inferred Precursor Transcript |        |       |       |      |              | Inferred Precursor Transcript |        |       |       |       |              |
|-------------------------------|--------|-------|-------|------|--------------|-------------------------------|--------|-------|-------|-------|--------------|
| Cluster coordinates           | Strand | Name  | Start | End  | Coverage (%) | Cluster coordinates           | Strand | Name  | Start | End   | Coverage (%) |
| sc1:429-861                   | +      |       | 429   | 661  | 82.4         | sc462:1642-2097               | +      |       | 1642  | 2097  | 0.0          |
| sc2:68-238                    | -      |       | 661   | 429  | 25.8         | sc471:5550-5778               | -      |       | 2098  | 1362  | 91.3         |
| sc196:342-609                 | -      | NCS33 | 58    | 238  | 85.4         |                               | -      | NCS76 | 5550  | 5778  | 28.4         |
| sc276:74-1288                 | +      |       | 468   | 58   | 96.8         | sc471:6204-6659               | +      | NCS53 | 5870  | 5190  | 99.9         |
| sc335:46-172                  | +      |       | 342   | 609  | 0.0          | sc473:1270-2094               | +      |       | 6204  | 6734  | 87.1         |
| sc335:463-721                 | +      | NCS42 | 649   | 122  | 95.3         | sc473:2266-2389               | +      |       | 6659  | 5114  | 86.1         |
| sc345:1-432                   | +      |       | 34    | 1303 | 33.8         | sc474:2097-2411               | +      |       | 1055  | 2134  | 100.0        |
| sc360:1541-1647               | +      |       | 1288  | 24   | 83.2         | sc476:6759-7299               | +      |       | 2094  | 1270  | 11.6         |
| sc365:495-600                 | +      |       | 46    | 172  | 48.8         | sc476:7961-8182               | +      |       | 666   | 2779  | 99.7         |
| sc375:37-696                  | +      |       | 172   | 46   | 46.5         | sc485:8485-9090               | +      |       | 2389  | 2266  | 0.0          |
| sc377:1723-2191               | +      | NCS84 | 463   | 721  | 9.7          | sc490:8033-8385               | +      |       | 2010  | 2960  | 100.0        |
| sc382:317-1193                | +      |       | 873   | 363  | 98.2         | sc497:9649-10263              | +      |       | 2411  | 2097  | 31.7         |
| sc388:360-681                 | +      |       | 1     | 441  | 78.5         | sc502:4-583                   | +      |       | 5702  | 6140  | 45.8         |
| sc388:833-1511                | +      | NCS85 | 432   | 1    | 48.4         | sc502:753-1055                | +      |       | 6100  | 5177  | 96.8         |
| sc391:1088-1185               | +      |       | 1351  | 1672 | 100.0        | sc506:13783-13836             | +      |       | 9679  | 7389  | 86.2         |
| sc391:1935-2433               | +      |       | 1647  | 1541 | 0.0          | sc508:7282-7527               | +      |       | 8182  | 7961  | 83.2         |
| sc409:577-712                 | +      |       | 44    | 620  | 98.9         | sc509:188-473                 | +      |       | 8475  | 9180  | 22.5         |
| sc412:1789-1960               | +      |       | 37    | 766  | 94.1         | sc509:9632-9853               | +      |       | 9090  | 8485  | 23.9         |
| sc413:1937-2027               | +      |       | 696   | 37   | 26.5         | sc511:1-213                   | +      |       | 8410  | 7163  | 100.0        |
| sc419:1286-1358               | +      | NCS72 | 1723  | 2191 | 16.0         | sc517:Feb-16                  | +      |       | 9127  | 9957  | 100.0        |
| sc425:395-1034                | +      |       | 2301  | 1343 | 95.9         | sc517:4869-5249               | +      |       | 9629  | 9427  | 12.3         |
| sc425:1295-2077               | +      |       | 317   | 1193 | 57.8         | sc517:5592-6682               | +      |       | 8255  | 8743  | 32.7         |
| sc435:32-1092                 | +      |       | 1193  | 244  | 78.9         | sc517:6922-7017               | +      |       | 8893  | 7675  | 95.7         |
| sc435:1977-2192               | +      |       | 601   | 250  | 86.9         | sc517:7607-7752               | +      |       | 9649  | 10263 | 68.5         |
| sc435:2434-2662               | +      |       | 833   | 1511 | 14.7         | sc519:294-618                 | +      |       | 10263 | 9189  | 98.3         |
| sc436:1030-1361               | +      |       | 1511  | 833  | 7.4          | sc522:1143-1744               | +      |       | 623   | 1     | 100.0        |
| sc437:3822-4066               | +      |       | 1078  | 1235 | 90.5         | sc523:Oct-05                  | +      |       | 753   | 1055  | 8.3          |
| sc438:1-1441                  | +      | NCS77 | 1235  | 1068 | 81.5         | sc523:2962-3417               | +      |       | 1075  | 625   | 100.0        |
| sc441:860-812                 | +      |       | 2453  | 1895 | 72.8         | sc523:5224-5445               | +      |       | 13783 | 14092 | 94.8         |
| sc451:79-2774                 | +      |       | 557   | 722  | 84.3         |                               | -      | NCS79 | 13837 | 13763 | 100.0        |
| sc455:5844-5967               | +      |       | 1643  | 2138 | 100.0        | sc508:7282-7527               | +      |       | 7276  | 7533  | 100.0        |
| sc462:65-1252                 | +      |       | 1960  | 1789 | 0.0          | sc509:188-473                 | +      |       | 7760  | 7282  | 97.9         |
|                               |        |       | 1157  | 2037 | 99.9         | sc509:9632-9853               | +      |       | 158   | 503   | 70.2         |
|                               |        |       | 2717  | 1899 | 100.0        | sc509:10321-10542             | +      |       | 533   | 188   | 54.9         |
|                               |        |       | 1262  | 1518 | 100.0        | sc511:1-213                   | +      |       | 9632  | 9632  | 77.4         |
|                               |        |       | 1398  | 1286 | 44.2         | sc517:Feb-16                  | +      |       | 10301 | 10602 | 87.4         |
|                               |        |       | 395   | 1034 | 15.9         | sc517:4869-5249               | +      |       | 10542 | 10321 | 22.5         |
|                               |        |       | 1184  | 225  | 93.2         | sc517:5592-6682               | +      |       | 11    | 213   | 0.0          |
|                               |        |       | 1295  | 2077 | 10.5         | sc517:6922-7017               | +      |       | 213   | 1     | 46.5         |
|                               |        |       | 2127  | 1215 | 86.6         | sc517:7607-7752               | +      |       | 1     | 3786  | 73.6         |
|                               |        |       | 32    | 1552 | 90.9         | sc519:294-618                 | +      |       | 2516  | 1     | 71.7         |
|                               |        |       | 1092  | 32   | 73.6         | sc522:1143-1744               | +      |       | 4779  | 5279  | 49.7         |
|                               |        |       | 1917  | 2312 | 83.6         | sc523:Oct-05                  | +      |       | 5249  | 4859  | 72.4         |
|                               |        |       | 2192  | 1977 | 23.1         | sc523:2962-3417               | +      |       | 5572  | 7096  | 97.8         |
|                               |        |       | 2434  | 2772 | 83.2         | sc523:5224-5445               | +      |       | 6682  | 5592  | 54.5         |
|                               |        |       | 2662  | 2434 | 21.8         |                               | -      |       | 6144  | 7040  | 99.8         |
|                               |        |       | 990   | 1881 | 100.0        |                               | -      |       | 7017  | 6922  | 26.0         |
|                               |        |       | 1361  | 1030 | 0.0          |                               | -      |       | 7607  | 7752  | 0.0          |
|                               |        |       | 3815  | 4072 | 98.8         |                               | -      |       | 7752  | 7327  | 83.8         |
|                               |        |       | 4396  | 3822 | 96.9         |                               | -      |       | 294   | 618   | 21.8         |
|                               |        |       | 1     | 1441 | 76.3         |                               | -      |       | 1118  | 290   | 98.2         |
|                               |        |       | 1454  | 1    | 73.5         |                               | -      |       | 1143  | 1744  | 8.3          |
|                               |        |       | 660   | 812  | 0.0          |                               | -      |       | 1744  | 1083  | 75.4         |
|                               |        |       | 895   | 450  | 96.4         |                               | -      |       | 1     | 2705  | 76.3         |
|                               |        |       | 66    | 3234 | 84.7         |                               | -      |       | 2718  | 1     | 82.2         |
|                               |        |       | 2774  | 79   | 77.1         |                               | -      |       | 2962  | 3417  | 0.0          |
|                               |        |       | 5844  | 5967 | 0.0          |                               | -      |       | 5224  | 5445  | 11.3         |
|                               |        |       | 6309  | 5442 | 99.0         |                               | -      |       | 5495  | 5151  | 95.0         |
|                               |        |       | 65    | 1252 | 85.9         |                               | -      |       |       |       |              |
|                               |        |       | 1252  | 65   | 76.4         |                               | -      |       |       |       |              |

Continued on next page



Table S3, continued

| Inferred Precursor Transcript |        |       |        |        |              | Inferred Precursor Transcript |        |      |        |        |              |
|-------------------------------|--------|-------|--------|--------|--------------|-------------------------------|--------|------|--------|--------|--------------|
| Cluster coordinates           | Strand | Name  | Start  | End    | Coverage (%) | Cluster coordinates           | Strand | Name | Start  | End    | Coverage (%) |
| sc697:26569-26676             | +      |       | 25879  | 26686  | 99.7         | sc721:29938-30311             | +      |      | 29938  | 30311  | 0.0          |
| sc701:29781-29871             | -      |       | 27214  | 26569  | 98.4         | sc721:30729-30988             | -      |      | 30351  | 29888  | 59.5         |
| sc701:57551-57929             | -      | NCS64 | 29356  | 29891  | 100.0        | sc721:31159-32062             | -      |      | 30699  | 30988  | 64.5         |
| sc701:83724-83892             | +      |       | 29941  | 29781  | 53.4         | sc721:42216-43245             | +      |      | 31018  | 30719  | 70.0         |
| sc709:24929-25083             | +      |       | 57431  | 57929  | 87.5         | sc721:83771-84102             | +      |      | 31149  | 32122  | 89.8         |
| sc709:28052-28465             | +      |       | 57939  | 57551  | 40.4         | sc721:87525-88833             | +      |      | 32082  | 31159  | 74.8         |
| sc709:43781-43874             | -      |       | 82724  | 83892  | 93.7         | sc721:104062-104151           | -      |      | 42201  | 43340  | 100.0        |
| sc709:69749-70066             | +      |       | 84282  | 83714  | 100.0        | sc721:140124-140427           | +      |      | 43255  | 42216  | 25.7         |
| sc709:86133-86705             | +      |       | 24738  | 25083  | 89.9         | sc721:145814-145981           | +      |      | 83771  | 85392  | 99.3         |
| sc710:8141-8912               | +      |       | 25357  | 24920  | 100.0        | sc721:191325-191431           | +      |      | 84102  | 83771  | 30.1         |
| sc710:12032-12080             | +      |       | 27952  | 28485  | 74.0         | sc721:193279-194025           | +      |      | 87525  | 88833  | 10.5         |
| sc710:12346-12436             | +      |       | 29028  | 28002  | 96.4         | sc721:27776-27936             | +      |      | 89781  | 87375  | 98.0         |
| sc710:12948-13955             | +      | NCS5  | 43171  | 43874  | 92.0         | sc721:27776-27936             | +      |      | 102375 | 104181 | 99.9         |
| sc710:36397-37654             | +      |       | 44304  | 43751  | 100.0        | sc721:45739-15963             | +      |      | 105461 | 104052 | 99.4         |
| sc710:37835-38239             | +      |       | 69159  | 70396  | 100.0        | sc721:46254-16496             | +      |      | 139464 | 140450 | 100.0        |
| sc710:38873-40259             | +      |       | 70066  | 69739  | 4.7          | sc721:47752-57752             | +      |      | 140577 | 140124 | 98.2         |
| sc710:126921-127123           | +      |       | 86825  | 85513  | 70.2         | sc721:54545-54748             | +      |      | 145784 | 145981 | 69.1         |
| sc710:108122-108755           | +      |       | 7781   | 9062   | 93.1         | sc721:59398-39759             | +      |      | 147571 | 145814 | 97.1         |
| sc710:28464-28791             | +      |       | 8912   | 8121   | 82.1         | sc721:59398-39759             | +      |      | 191135 | 193881 | 100.0        |
| sc710:29088-29402             | +      |       | 12002  | 12080  | 82.3         | sc721:59398-39759             | +      |      | 191431 | 191325 | 0.0          |
| sc710:11363-11513             | +      |       | 12080  | 12032  | 0.0          | sc721:59398-39759             | +      |      | 277616 | 278030 | 100.0        |
| sc710:112909-112975           | +      |       | 12236  | 12436  | 80.1         | sc721:59398-39759             | +      |      | 277986 | 277776 | 39.8         |
| sc710:28464-28791             | +      |       | 12436  | 12346  | 0.0          | sc721:59398-39759             | +      |      | 28748  | 29235  | 97.5         |
| sc710:29088-29402             | +      |       | 12948  | 14355  | 99.4         | sc721:59398-39759             | +      |      | 29765  | 29148  | 100.0        |
| sc710:159394-159521           | +      |       | 13955  | 12948  | 25.0         | sc721:59398-39759             | +      |      | 4260   | 4704   | 96.4         |
| sc710:52927-53456             | +      |       | 36327  | 37704  | 86.4         | sc721:59398-39759             | +      |      | 5464   | 4321   | 97.6         |
| sc710:80650-80667             | +      |       | 37654  | 36397  | 7.9          | sc721:59398-39759             | +      |      | 14289  | 15963  | 98.0         |
| sc710:90983-81279             | +      |       | 37813  | 38259  | 96.2         | sc721:59398-39759             | +      |      | 16687  | 15739  | 91.4         |
| sc710:145408-145856           | +      |       | 38249  | 37835  | 21.9         | sc721:59398-39759             | +      |      | 15514  | 16536  | 99.5         |
| sc710:188938-189063           | +      |       | 38873  | 40279  | 11.1         | sc721:59398-39759             | +      |      | 16496  | 16214  | 74.9         |
| sc720:17512-17778             | +      |       | 40259  | 38864  | 98.7         | sc721:59398-39759             | +      |      | 9370   | 12730  | 100.0        |
| sc720:86102-86250             | +      |       | 126651 | 127123 | 87.9         | sc721:59398-39759             | +      |      | 9627   | 9377   | 0.0          |
|                               |        |       | 128033 | 126921 | 97.6         | sc721:59398-39759             | +      |      | 20830  | 21254  | 85.9         |
|                               |        |       | 108122 | 108755 | 27.9         | sc721:59398-39759             | +      |      | 21184  | 20870  | 46.0         |
|                               |        |       | 108835 | 107733 | 96.0         | sc721:59398-39759             | +      |      | 43865  | 47137  | 100.0        |
|                               |        |       | 125569 | 126026 | 100.0        | sc721:59398-39759             | +      |      | 47963  | 47015  | 99.0         |
|                               |        |       | 126958 | 125879 | 99.0         | sc721:59398-39759             | +      |      | 82752  | 82976  | 23.1         |
|                               |        |       | 113325 | 112909 | 90.2         | sc721:59398-39759             | +      |      | 82976  | 82752  | 0.0          |
|                               |        |       | 113325 | 112909 | 90.2         | sc721:59398-39759             | +      |      | 8235   | 8765   | 89.2         |
|                               |        |       | 28444  | 29886  | 96.8         | sc721:59398-39759             | +      |      | 9265   | 8531   | 100.0        |
|                               |        |       | 28791  | 28444  | 14.4         | sc721:59398-39759             | +      |      | 34804  | 35499  | 67.5         |
|                               |        |       | 28657  | 29886  | 99.8         | sc721:59398-39759             | +      |      | 35229  | 34784  | 10.8         |
|                               |        |       | 29402  | 29088  | 0.0          | sc721:59398-39759             | +      |      | 48729  | 49058  | 42.4         |
|                               |        |       | 158574 | 159531 | 99.4         | sc721:59398-39759             | +      |      | 49078  | 48634  | 99.8         |
|                               |        |       | 160538 | 159389 | 100.0        | sc721:59398-39759             | +      |      | 49210  | 49471  | 99.8         |
|                               |        |       | 52927  | 53456  | 0.0          | sc721:59398-39759             | +      |      | 50968  | 49220  | 99.5         |
|                               |        |       | 78360  | 80677  | 100.0        | sc721:59398-39759             | +      |      | 2878   | 3451   | 4.4          |
|                               |        |       | 81447  | 80550  | 95.5         | sc721:59398-39759             | +      |      | 3467   | 1323   | 99.4         |
|                               |        |       | 80983  | 81309  | 15.3         | sc721:59398-39759             | +      |      | 32004  | 32422  | 74.7         |
|                               |        |       | 81449  | 80582  | 98.8         | sc721:59398-39759             | +      |      | 32342  | 32064  | 41.9         |
|                               |        |       | 145408 | 145907 | 67.7         | sc721:59398-39759             | +      |      | 32991  | 33373  | 100.0        |
|                               |        |       | 145866 | 145408 | 18.3         | sc721:59398-39759             | +      |      | 33372  | 33051  | 39.1         |
|                               |        |       | 187376 | 189093 | 98.8         | sc721:59398-39759             | +      |      | 55804  | 56430  | 100.0        |
|                               |        |       | 190169 | 189926 | 99.5         | sc721:59398-39759             | +      |      | 56360  | 55954  | 0.0          |
|                               |        |       | 16912  | 17198  | 84.7         | sc721:59398-39759             | +      |      | 57700  | 60475  | 38.1         |
|                               |        |       | 17848  | 16962  | 100.0        | sc721:59398-39759             | +      |      | 60249  | 57720  | 60.7         |
|                               |        |       | 17512  | 17788  | 70.8         | sc721:59398-39759             | +      |      | 62545  | 63722  | 10.2         |
|                               |        |       | 17848  | 16972  | 100.0        | sc721:59398-39759             | +      |      | 69378  | 71694  | 76.4         |
|                               |        |       | 85842  | 86250  | 100.0        | sc721:59398-39759             | +      |      | 71630  | 69318  | 99.0         |
|                               |        |       | 87980  | 86102  | 99.4         |                               |        |      |        |        |              |
|                               |        |       |        |        |              | sc1014:84431-84529            | +      |      | 83571  | 84531  | 100.0        |
|                               |        |       |        |        |              | sc1014:118810-119191          | -      |      | 84875  | 84412  | 100.0        |
|                               |        |       |        |        |              | sc1017:23149-23389            | +      |      | 118810 | 119561 | 90.2         |
|                               |        |       |        |        |              | sc1017:23803-23901            | +      |      | 119211 | 118800 | 36.4         |
|                               |        |       |        |        |              | sc1018:68-470                 | +      |      | 23119  | 23469  | 91.7         |
|                               |        |       |        |        |              | sc1018:39398-39759            | +      |      | 23389  | 23149  | 25.3         |
|                               |        |       |        |        |              | sc1018:39398-39759            | +      |      | 23573  | 23991  | 92.6         |
|                               |        |       |        |        |              | sc1018:39398-39759            | +      |      | 23943  | 23763  | 87.2         |
|                               |        |       |        |        |              | sc1018:39398-39759            | +      |      | 68     | 470    | 6.2          |
|                               |        |       |        |        |              | sc1018:39398-39759            | +      |      | 470    | 58     | 63.9         |
|                               |        |       |        |        |              | sc1020:22731-23586            | +      |      | 39399  | 39759  | 81.8         |
|                               |        |       |        |        |              | sc1020:22731-23586            | +      |      | 39929  | 39398  | 98.1         |
|                               |        |       |        |        |              | sc1020:22731-23586            | +      |      | 3716   | 4013   | 0.0          |
|                               |        |       |        |        |              | sc1020:22731-23586            | +      |      | 4116   | 3606   | 95.1         |
|                               |        |       |        |        |              | sc1020:22731-23586            | +      |      | 4270   | 4488   | 52.1         |
|                               |        |       |        |        |              | sc1020:22731-23586            | +      |      | 4568   | 4240   | 83.9         |
|                               |        |       |        |        |              | sc1020:22731-23586            | +      |      | 22731  | 23616  | 71.8         |
|                               |        |       |        |        |              | sc1020:22731-23586            | +      |      | 24306  | 22729  | 100.0        |
|                               |        |       |        |        |              | sc1020:22731-23586            | +      |      | 52218  | 53355  | 90.8         |
|                               |        |       |        |        |              | sc1020:22731-23586            | +      |      | 53355  | 52490  | 59.0         |
|                               |        |       |        |        |              | sc1020:22731-23586            | +      |      | 53739  | 55041  | 100.0        |
|                               |        |       |        |        |              | sc1020:22731-23586            | +      |      | 54241  | 54039  | 12.3         |
|                               |        |       |        |        |              | sc1020:22731-23586            | +      |      | 53745  | 55041  | 100.0        |
|                               |        |       |        |        |              | sc1020:22731-23586            | +      |      | 54748  | 54545  | 0.0          |
|                               |        |       |        |        |              | sc1020:22731-23586            | +      |      | 54966  | 59245  | 72.9         |
|                               |        |       |        |        |              | sc1020:22731-23586            | +      |      | 57752  | 54956  | 75.3         |
|                               |        |       |        |        |              | sc1020:22731-23586            | +      |      | 79795  | 80410  | 72.6         |
|                               |        |       |        |        |              | sc1020:22731-23586            | +      |      | 80260  | 79835  | 5.9          |
|                               |        |       |        |        |              | sc1020:22731-23586            | +      |      | 87263  | 87634  | 92.9         |
|                               |        |       |        |        |              | sc1020:22731-23586            | +      |      | 87522  | 87293  | 10.9         |
|                               |        |       |        |        |              | sc1020:22731-23586            | +      |      | 20443  | 21016  | 91.5         |
|                               |        |       |        |        |              | sc1020:22731-23586            | +      |      | 22516  | 20881  | 100.0        |
|                               |        |       |        |        |              | sc1020:22731-23586            | +      |      | 2434   | 2476   | 100.0        |
|                               |        |       |        |        |              | sc1020:22731-23586            | +      |      | 2876   | 2854   | 29.3         |
|                               |        |       |        |        |              | sc1020:22731-23586            | +      |      | 12261  | 12700  | 100.0        |
|                               |        |       |        |        |              | sc1020:22731-23586            | +      |      | 12706  | 12341  | 31.7         |
|                               |        |       |        |        |              | sc1020:22731-23586            | +      |      | 24348  | 24490  | 93.0         |
|                               |        |       |        |        |              | sc1020:22731-23586            | +      |      | 24480  | 24448  | 78.8         |
|                               |        |       |        |        |              | sc1020:22731-23586            | +      |      | 17044  | 17413  | 83.2         |
|                               |        |       |        |        |              | sc1020:22731-23586            | +      |      | 17242  | 17084  | 81.4         |
|                               |        |       |        |        |              | sc1020:22731-23586            | +      |      | 1269   | 2262   | 88.0         |
|                               |        |       |        |        |              | sc1020:22731-23586            | +      |      | 39441  | 39939  | 60.7         |
|                               |        |       |        |        |              | sc1020:22731-23586            | +</    |      |        |        |              |

Table S3, continued

| Inferred Precursor Transcript |        |       |        |        |              | Inferred Precursor Transcript |        |       |        |        |              |
|-------------------------------|--------|-------|--------|--------|--------------|-------------------------------|--------|-------|--------|--------|--------------|
| Cluster coordinates           | Strand | Name  | Start  | End    | Coverage (%) | Cluster coordinates           | Strand | Name  | Start  | End    | Coverage (%) |
| sc1036:60983-61850            | +      |       | 60983  | 61850  | 27.5         | sc1053:6186-6792              | +      |       | 6186   | 6792   | 0.0          |
| sc1036:62937-63102            | -      |       | 62122  | 63102  | 100.0        | sc1054:27472-27504            | -      | NCS29 | 6822   | 6146   | 69.1         |
| sc1038:24981-25209            | +      |       | 64214  | 62937  | 97.2         | sc1055:50052-50551            | +      |       | 27372  | 27524  | 98.0         |
| sc1038:40735-41170            | +      |       | 24891  | 25209  | 67.7         | sc1055:78975-79463            | -      |       | 27504  | 27472  | 78.8         |
| sc1038:78785-78877            | +      |       | 25209  | 24981  | 52.8         | sc1055:81055-83050            | +      |       | 50036  | 50551  | 84.1         |
| sc1038:98617-99774            | +      |       | 40735  | 41170  | 66.9         | sc1055:138817-138892          | +      |       | 51125  | 50052  | 92.6         |
| sc1038:140777-140824          | +      |       | 41177  | 40347  | 99.9         | sc1055:156208-156447          | +      |       | 78975  | 79463  | 17.8         |
| sc1040:36238-36577            | +      | NCS52 | 78524  | 78887  | 100.0        | sc1055:162746-162961          | +      |       | 79521  | 78899  | 100.0        |
| sc1040:37256-37420            | +      |       | 80593  | 78785  | 99.2         | sc1055:17367-17625            | +      | NCS66 | 81055  | 83050  | 36.7         |
| sc1040:123627-123701          | +      |       | 98328  | 99784  | 99.7         | sc1055:31494-31606            | +      |       | 83056  | 81055  | 99.6         |
| sc1040:180260-180348          | +      |       | 100673 | 99617  | 99.0         | sc1055:46888-146432           | +      |       | 138387 | 138982 | 100.0        |
| sc1040:195062-195337          | +      |       | 140757 | 140824 | 36.8         | sc1055:58094-158319           | +      |       | 138932 | 138777 | 79.5         |
| sc1041:89645-89736            | +      |       | 140824 | 140767 | 6.3          | sc1055:65453-165750           | +      |       | 146756 | 147370 | 97.4         |
| sc1041:45378-45481            | +      |       | 36227  | 36660  | 99.1         | sc1055:66532-168895           | +      |       | 147158 | 147016 | 35.0         |
| sc1043:4383-4807              | +      |       | 36577  | 36238  | 0.0          | sc1055:74775-174961           | +      |       | 156208 | 156447 | 10.5         |
| sc1043:45640-45767            | +      |       | 37206  | 37490  | 84.2         | sc1055:81055-83050            | +      |       | 156447 | 156198 | 12.5         |
| sc1044:46-774                 | +      |       | 37420  | 37246  | 3.6          | sc1055:83056-83056            | +      |       | 158319 | 158084 | 10.6         |
| sc1044:66037-66426            | +      |       | 122977 | 123721 | 100.0        | sc1055:83056-83056            | +      |       | 162726 | 162973 | 85.4         |
| sc1044:70189-71131            | +      |       | 123711 | 123627 | 98.8         | sc1055:83056-83056            | +      |       | 162961 | 162746 | 23.1         |
| sc1044:71474-71561            | +      |       | 180260 | 180348 | 55.1         | sc1055:83056-83056            | +      |       | 16817  | 17825  | 96.2         |
| sc1044:73216-73441            | +      |       | 180350 | 180260 | 44.9         | sc1055:83056-83056            | +      |       | 17695  | 17367  | 43.5         |
| sc1045:5356-5590              | +      |       | 195012 | 195337 | 61.3         | sc1055:83056-83056            | +      |       | 17931  | 158761 | 98.9         |
| sc1045:11221-11566            | +      |       | 195337 | 195062 | 0.0          | sc1055:83056-83056            | +      |       | 182943 | 31606  | 100.0        |
| sc1045:72660-72730            | +      |       | 88805  | 89746  | 100.0        | sc1055:83056-83056            | +      |       | 32656  | 31494  | 99.6         |
| sc1045:11842-11982            | +      |       | 90562  | 89645  | 94.1         | sc1055:83056-83056            | +      |       | 45828  | 146432 | 26.7         |
| sc1046:7429-7543              | +      |       | 101687 | 102814 | 100.0        | sc1055:83056-83056            | +      |       | 146457 | 145875 | 100.0        |
| sc1047:46135-46410            | +      |       | 102814 | 101767 | 20.3         | sc1055:83056-83056            | +      |       | 165443 | 165750 | 57.5         |
| sc1048:23852-24038            | +      |       | 102814 | 101767 | 20.3         | sc1055:83056-83056            | +      |       | 166532 | 169001 | 88.0         |
| sc1050:34744-35601            | +      |       | 3303   | 4892   | 99.9         | sc1055:83056-83056            | +      |       | 168905 | 165322 | 96.0         |
| sc1050:87452-87670            | +      |       | 4807   | 4383   | 23.8         | sc1055:83056-83056            | +      |       | 174035 | 174961 | 90.2         |
|                               | +      |       | 14277  | 14538  | 21.0         | sc1055:83056-83056            | +      |       | 175389 | 174775 | 99.5         |
|                               | +      |       | 45378  | 45607  | 82.6         | sc1055:83056-83056            | +      |       | 20488  | 19613  | 28.9         |
|                               | +      |       | 45610  | 45807  | 94.4         | sc1055:83056-83056            | +      |       | 20682  | 19613  | 12.0         |
|                               | +      |       | 45767  | 45640  | 0.0          | sc1055:83056-83056            | +      |       | 21525  | 20651  | 27.3         |
|                               | +      |       | 784    | 784    | 97.2         | sc1055:83056-83056            | +      |       | 45226  | 46715  | 100.0        |
|                               | +      |       | 874    | 46     | 65.3         | sc1055:83056-83056            | +      |       | 46126  | 45831  | 0.0          |
|                               | +      |       | 66601  | 66866  | 100.0        | sc1055:83056-83056            | +      |       | 63376  | 63821  | 31.6         |
|                               | +      |       | 66436  | 66037  | 18.8         | sc1055:83056-83056            | +      |       | 63821  | 63386  | 95.2         |
|                               | +      |       | 70189  | 71131  | 85.6         | sc1055:83056-83056            | +      |       | 93011  | 91611  | 99.4         |
|                               | +      |       | 71131  | 70139  | 42.9         | sc1055:83056-83056            | +      |       | 180232 | 181413 | 99.9         |
|                               | +      |       | 71414  | 71673  | 92.2         | sc1055:83056-83056            | +      |       | 182233 | 181295 | 99.7         |
|                               | +      |       | 71561  | 71474  | 28.4         | sc1055:83056-83056            | +      |       | 182440 | 182819 | 13.2         |
|                               | +      |       | 73216  | 73551  | 91.1         | sc1055:83056-83056            | +      |       | 183209 | 182368 | 99.9         |
|                               | +      |       | 73441  | 73216  | 11.1         | sc1055:83056-83056            | +      |       | 182991 | 183171 | 27.6         |
|                               | +      |       | 5186   | 6146   | 100.0        | sc1055:83056-83056            | +      |       | 183208 | 182368 | 100.0        |
|                               | +      |       | 5590   | 5316   | 27.3         | sc1055:83056-83056            | +      |       | 213574 | 214186 | 57.7         |
|                               | +      |       | 11221  | 11566  | 0.0          | sc1055:83056-83056            | +      |       | 214266 | 213584 | 93.9         |
|                               | +      |       | 12176  | 10471  | 100.0        | sc1055:83056-83056            | +      |       | 25     | 2594   | 77.5         |
|                               | +      |       | 72090  | 72770  | 100.0        | sc1055:83056-83056            | +      |       | 2607   | 15     | 81.9         |
|                               | +      |       | 72730  | 72660  | 69.0         | sc1055:83056-83056            | +      |       | 2851   | 3306   | 0.0          |
|                               | +      |       | 111842 | 111982 | 0.0          | sc1055:83056-83056            | +      |       | 3307   | 2571   | 91.3         |
|                               | +      |       | 111982 | 111842 | 0.0          | sc1055:83056-83056            | +      |       | 102306 | 102712 | 100.0        |
|                               | +      |       | 7179   | 7563   | 100.0        | sc1055:83056-83056            | +      |       | 102697 | 102338 | 99.7         |
|                               | +      |       | 7543   | 7429   | 41.7         | sc1055:83056-83056            | +      |       | 112418 | 112756 | 0.0          |
|                               | +      |       | 45041  | 46452  | 100.0        | sc1055:83056-83056            | +      |       | 112765 | 112648 | 75.0         |
|                               | +      |       | 47271  | 46135  | 90.9         | sc1055:83056-83056            | +      |       | 144909 | 146497 | 15.9         |
|                               | +      |       | 23730  | 24042  | 100.0        | sc1055:83056-83056            | +      |       | 146507 | 144759 | 99.2         |
|                               | +      |       | 24038  | 23852  | 0.0          | sc1055:83056-83056            | +      |       |        |        |              |
|                               | +      |       | 34744  | 35601  | 2.9          | sc1055:83056-83056            | +      |       |        |        |              |
|                               | +      |       | 35601  | 34714  | 86.8         | sc1055:83056-83056            | +      |       |        |        |              |
|                               | +      |       | 87452  | 87761  | 85.5         | sc1055:83056-83056            | +      |       |        |        |              |
|                               | +      |       | 87700  | 87452  | 20.1         | sc1055:83056-83056            | +      |       |        |        |              |

| Inferred Precursor Transcript |        |      |        |        |              | Inferred Precursor Transcript |        |       |        |        |              |
|-------------------------------|--------|------|--------|--------|--------------|-------------------------------|--------|-------|--------|--------|--------------|
| Cluster coordinates           | Strand | Name | Start  | End    | Coverage (%) | Cluster coordinates           | Strand | Name  | Start  | End    | Coverage (%) |
| sc1060:25656-25673            | +      |      | 24400  | 25673  | 98.5         | sc1063:2701-2992              | +      |       | 1104   | 2992   | 93.4         |
| sc1060:39108-39165            | -      |      | 25993  | 25555  | 100.0        | sc1063:3222-3443              | +      | NCS73 | 3112   | 2701   | 96.0         |
| sc1060:42579-42718            | -      |      | 38548  | 39200  | 100.0        | sc1063:14827-15332            | +      |       | 15818  | 14827  | 100.0        |
| sc1060:52921-53199            | +      |      | 39751  | 39088  | 98.9         | sc1063:20875-20976            | +      |       | 18455  | 21016  | 99.8         |
| sc1060:52921-53199            | +      |      | 42498  | 42721  | 100.0        | sc1063:56615-56692            | +      |       | 21276  | 20875  | 86.3         |
| sc1061:40596-40933            | +      |      | 42976  | 42569  | 96.2         | sc1063:57039-57172            | +      |       | 56605  | 56702  | 89.8         |
| sc1061:41318-41547            | +      |      | 52415  | 53199  | 94.7         | sc1063:58684-58771            | +      |       | 56992  | 56615  | 32.1         |
| sc1061:40596-40933            | +      |      | 53199  | 52921  | 38.7         | sc2000:4199-4861              | +      | NCS63 | 5631   | 4911   | 100.0        |
| sc1061:40596-40933            | +      |      | 40143  | 40933  | 100.0        | sc2000:53765-53901            | +      |       | 53765  | 53901  | 18.2         |
| sc1061:41318-41547            | +      |      | 40943  | 40596  | 38.8         | sc2000:86459-86528            | +      |       | 53901  | 53765  | 0.0          |
| sc1061:133662-133867          | -      |      | 41567  | 40908  | 100.0        | sc2000:90080-90252            | +      |       | 86459  | 86742  | 87.5         |
| sc1063:2701-2992              | +      |      | 133917 | 132348 | 100.0        | sc2000:90258-90298            | +      |       | 86528  | 86459  | 0.0          |
| sc1063:3222-3443              | +      |      | 1102   | 2992   | 93.4         | sc2001:3713-4119              | +      |       | 90258  | 90080  | 49.7         |
| sc1063:14827-15332            | +      |      | 15818  | 14827  | 100.0        | sc2002:133190-133467          | +      | NCS50 | 33020  | 135583 | 100.0        |
| sc1063:20875-20976            | +      |      | 18455  | 21016  | 99.8         | sc2002:154632-154877          | +      |       | 133467 | 133190 | 0.0          |
| sc1063:56615-56692            | +      |      | 21276  | 20875  | 86.3         | sc2003:115485-115693          | +      | NCS78 | 155142 | 154632 | 98.2         |
| sc1063:57039-57172            | +      |      | 56605  | 56702  | 89.8         | sc2003:132090-133685          | +      |       | 115485 | 115733 | 30.1         |
| sc1063:58684-58771            | +      |      | 56992  | 56615  | 32.1         | sc2003:144264-144336          | +      |       | 115693 | 115455 | 66.7         |
| sc2000:4199-4861              | +      |      | 5631   | 4911   | 100.0        | sc2003:144264-144336          | +      |       | 131860 | 132090 | 99.7         |
| sc2000:53765-53901            | +      |      | 53765  | 53901  | 18.2         | sc2003:135010-135312          | +      |       | 133715 | 133682 | 26.9         |
| sc2000:86459-86528            | +      |      | 86459  | 86742  | 87.5         | sc2003:135010-135312          | +      |       | 134440 | 135332 | 100.0        |
| sc2000:90080-90252            | +      |      | 86528  | 86459  | 0.0          | sc2003:144264-144336          | +      |       | 144324 | 144242 | 100.0        |
| sc2001:3713-4119              | +      |      | 90258  | 90080  | 49.7         | sc2003:227241-227476          | +      | NCS46 | 227221 | 227716 | 98.4         |
| sc2002:133190-133467          | +      |      | 133467 | 133190 | 0.0          | sc2003:260941-261041          | +      |       | 227486 | 227241 | 99.3         |
| sc2002:154632-154877          | +      |      | 155142 | 154632 | 98.2         | sc2003:260941-261041          | +      |       | 260949 | 261071 | 99.9         |
| sc2003:115485-115693          | +      |      | 115485 | 115733 | 30.1         |                               |        |       | 262267 | 260881 |              |
| sc2003:132090-133685          | +      |      | 115693 | 115455 | 66.7         |                               |        |       |        |        |              |
| sc2003:144264-144336          | +      |      | 131860 | 132090 | 99.7         |                               |        |       |        |        |              |
| sc2003:144264-144336</        |        |      |        |        |              |                               |        |       |        |        |              |

**Table S4.** mRNA-Seq analysis of wild-type (WT) and RNAi-mutant strains. Each tag was comprised of the first 25 nt of a 36-nt Illumina read.

|                                  | WT_1      | WT_2      | $\Delta ago1$ _1 | $\Delta ago1$ _2 | $\Delta dcr1$ _1 | $\Delta dcr1$ _2 | Total      |
|----------------------------------|-----------|-----------|------------------|------------------|------------------|------------------|------------|
| <b>Sequencing</b>                |           |           |                  |                  |                  |                  |            |
| Total reads (tags)               | 5,237,134 | 5,710,767 | 5,469,626        | 5,672,984        | 5,481,666        | 5,873,485        | 33,445,662 |
| Unique tags                      | 2,362,087 | 2,355,724 | 1,792,636        | 2,166,169        | 2,079,539        | 2,128,205        | 12,884,360 |
| <b>Mapping of tags</b>           |           |           |                  |                  |                  |                  |            |
| Genome-matching tags             | 3,913,229 | 4,594,533 | 4,256,197        | 4,682,941        | 4,609,746        | 4,972,396        | 27,029,042 |
| <i>% of total tags</i>           | 74.7      | 80.5      | 77.8             | 82.5             | 84.1             | 84.7             | 80.8       |
| Unique genome-matching tags      | 1,239,480 | 1,439,462 | 905,718          | 1,367,051        | 1,367,339        | 1,416,775        | 7,735,825  |
| <i>% of total tags</i>           | 52.5      | 61.1      | 50.5             | 63.1             | 65.8             | 66.6             | 60.0       |
| Total genomic hits               | 1,283,574 | 1,487,146 | 943,739          | 1,415,491        | 1,415,527        | 1,467,372        | 8,012,849  |
| <b>Analysis</b>                  |           |           |                  |                  |                  |                  |            |
| rRNA tags                        | 490,038   | 562,592   | 699,948          | 615,593          | 613,841          | 755,697          | 3,737,709  |
| <i>% of genome-matching tags</i> | 12.5      | 12.2      | 16.4             | 13.1             | 13.3             | 15.2             | 13.8       |
| tRNA tags                        | 559       | 566       | 738              | 604              | 576              | 722              | 3,765      |
| <i>% of genome-matching tags</i> | <0.1      | <0.1      | <0.1             | <0.1             | <0.1             | <0.1             | <0.1       |
| Sense annotated ORF tags         | 2,949,357 | 3,426,898 | 3,167,181        | 3,518,675        | 3,487,311        | 3,705,506        | 20,254,928 |
| <i>% of genome-matching tags</i> | 75.4      | 74.6      | 74.4             | 75.1             | 75.7             | 74.5             | 74.9       |
| Antisense annotated ORF tags     | 74,307    | 84,847    | 102,596          | 92,149           | 94,662           | 115,526          | 564,087    |
| <i>% of genome-matching tags</i> | 1.9       | 1.8       | 2.4              | 2.0              | 2.1              | 2.3              | 2.1        |



**Table S6.** Number of colonies obtained upon transformation of each strain with the plasmid indicated, labeled as in figure S11A. Three independent transformations are shown (summed in figure S11A).

| Plasmid          | Transformation 1 |              |              | Transformation 2 |              |              | Transformation 3 |              |              |
|------------------|------------------|--------------|--------------|------------------|--------------|--------------|------------------|--------------|--------------|
|                  | WT               | <i>Δago1</i> | <i>Δdcr1</i> | WT               | <i>Δago1</i> | <i>Δdcr1</i> | WT               | <i>Δago1</i> | <i>Δdcr1</i> |
| CEN              | 66               | 0            | 0            | 186              | 5            | 8            | 48               | 0            | 2            |
| 2μ               | 77               | 9            | 6            | 10               | 0            | 1            | 18               | 2            | 0            |
| 2μ Ago1          | 106              | 5            | 20           | 98               | 0            | 0            | 21               | 2            | 5            |
| 2μ Ago1, induced | 68               | 44           | 3            | 78               | 26           | 0            | 23               | 26           | 1            |
| 2μ Dcr1          | 95               | 9            | 4            | 51               | 0            | 3            | 23               | 0            | 4            |
| 2μ Dcr1, induced | 58               | 2            | 70           | 48               | 0            | 24           | 36               | 0            | 33           |

**Table S7.** Strains used and generated in this study.

| Strain | Genotype                                                                                                                            | Species                       | Reference  |
|--------|-------------------------------------------------------------------------------------------------------------------------------------|-------------------------------|------------|
| FY45   | MAT $\alpha$ /MAT $\alpha$                                                                                                          | <i>S. cerevisiae</i> S288C    | (30)       |
| F2035  | MAT $\alpha$ /MAT $\alpha$                                                                                                          | <i>S. bayanus</i> MCYC623     | NCYC       |
| KpolWT | Wild-type                                                                                                                           | <i>K. polysporus</i> DSM70294 | (31)       |
| Can14  | MAT $\alpha$ /MAT $\alpha$                                                                                                          | <i>C. albicans</i> SC5314     | (32)       |
| F2037  | Wild-type                                                                                                                           | <i>S. castellii</i> CBS4309   | NCYC       |
| Y235   | MAT $\alpha$ /MAT $\alpha$ <i>ura3-1/ura3-1</i>                                                                                     | <i>S. castellii</i> CBS4310   | (33)       |
| DPB002 | MAT $\alpha$ /MAT $\alpha$ <i>ura3-1/ura3-1 ago1<math>\Delta</math>::HYG ago1<math>\Delta</math>::HYG</i>                           | <i>S. castellii</i> CBS4310   | This study |
| DPB003 | MAT $\alpha$ /MAT $\alpha$ <i>ura3-1/ura3-1 dcr1<math>\Delta</math>::loxP-KanMX6-loxP/dcr1<math>\Delta</math>::loxP-KanMX6-loxP</i> | <i>S. castellii</i> CBS4310   | This study |
| DPB004 | MAT $\alpha$ <i>ura3-1 ho<math>\Delta</math></i>                                                                                    | <i>S. castellii</i> CBS4310   | This study |
| DPB006 | MAT $\alpha$ <i>ura3-1 ho<math>\Delta</math> ago1<math>\Delta</math>::HYG</i>                                                       | <i>S. castellii</i> CBS4310   | This study |
| DPB008 | MAT $\alpha$ <i>ura3-1 ho<math>\Delta</math> dcr1<math>\Delta</math>::loxP-KanMX6-loxP</i>                                          | <i>S. castellii</i> CBS4310   | This study |
| DPB005 | MAT $\alpha$ <i>ura3-1 ho<math>\Delta</math></i>                                                                                    | <i>S. castellii</i> CBS4310   | This study |
| DPB007 | MAT $\alpha$ <i>ura3-1 ho<math>\Delta</math> ago1<math>\Delta</math>::HYG</i>                                                       | <i>S. castellii</i> CBS4310   | This study |
| DPB009 | MAT $\alpha$ <i>ura3-1 ho<math>\Delta</math> dcr1<math>\Delta</math>::loxP-KanMX6-loxP</i>                                          | <i>S. castellii</i> CBS4310   | This study |
| DPB220 | MAT $\alpha$ <i>ura3-1 ho<math>\Delta</math> Flag<sub>3</sub>-AGO1</i>                                                              | <i>S. castellii</i> CBS4310   | This study |
| DPB313 | MAT $\alpha$ <i>ura3-1 ho<math>\Delta</math> ago1<math>\Delta</math>::HYG</i>                                                       | <i>S. castellii</i> CBS4310   | This study |
| DPB318 | MAT $\alpha$ <i>ura3-1 ho<math>\Delta</math> dcr1<math>\Delta</math></i>                                                            | <i>S. castellii</i> CBS4310   | This study |
| DPB314 | MAT $\alpha$ <i>ho<math>\Delta</math> ura3::EGFP(S65T)-KanMX6</i>                                                                   | <i>S. castellii</i> CBS4310   | This study |
| DPB317 | MAT $\alpha$ <i>ho<math>\Delta</math> ago1<math>\Delta</math>::HYG ura3::EGFP(S65T)-KanMX6</i>                                      | <i>S. castellii</i> CBS4310   | This study |
| DPB321 | MAT $\alpha$ <i>ho<math>\Delta</math> dcr1<math>\Delta</math> ura3::EGFP(S65T)-KanMX6</i>                                           | <i>S. castellii</i> CBS4310   | This study |
| DPB331 | MAT $\alpha$ <i>ho<math>\Delta</math> ura3::EGFP(S65T)-KanMX6 c633::plp</i>                                                         | <i>S. castellii</i> CBS4310   | This study |
| DPB332 | MAT $\alpha$ <i>ho<math>\Delta</math> ura3::EGFP(S65T)-KanMX6 c633::plp-weakSC_GFP</i>                                              | <i>S. castellii</i> CBS4310   | This study |
| DPB333 | MAT $\alpha$ <i>ho<math>\Delta</math> ura3::EGFP(S65T)-KanMX6 c633::plp-strongSC_GFP</i>                                            | <i>S. castellii</i> CBS4310   | This study |
| DPB334 | MAT $\alpha$ <i>ho<math>\Delta</math> ago1<math>\Delta</math>::HYG ura3::EGFP(S65T)-KanMX6 c633::plp</i>                            | <i>S. castellii</i> CBS4310   | This study |
| DPB335 | MAT $\alpha$ <i>ho<math>\Delta</math> ago1<math>\Delta</math>::HYG ura3::EGFP(S65T)-KanMX6 c633::plp-weakSC_GFP</i>                 | <i>S. castellii</i> CBS4310   | This study |
| DPB336 | MAT $\alpha$ <i>ho<math>\Delta</math> ago1<math>\Delta</math>::HYG ura3::EGFP(S65T)-KanMX6 c633::plp-strongSC_GFP</i>               | <i>S. castellii</i> CBS4310   | This study |
| DPB337 | MAT $\alpha$ <i>ho<math>\Delta</math> dcr1<math>\Delta</math> ura3::EGFP(S65T)-KanMX6 c633::plp</i>                                 | <i>S. castellii</i> CBS4310   | This study |
| DPB338 | MAT $\alpha$ <i>ho<math>\Delta</math> dcr1<math>\Delta</math> ura3::EGFP(S65T)-KanMX6 c633::plp-weakSC_GFP</i>                      | <i>S. castellii</i> CBS4310   | This study |
| DPB339 | MAT $\alpha$ <i>ho<math>\Delta</math> dcr1<math>\Delta</math> ura3::EGFP(S65T)-KanMX6 c633::plp-strongSC_GFP</i>                    | <i>S. castellii</i> CBS4310   | This study |
| F2005  | MAT $\alpha$ <i>his3<math>\Delta</math>1 leu2<math>\Delta</math>0 lys2<math>\Delta</math>0 ura3<math>\Delta</math>0</i>             | <i>S. cerevisiae</i> BY4742   | (30)       |
| L4718  | MAT $\alpha$ <i>leu2-3,112 trp1-1 can1-100 ura3-1 ade2-1 his3-11,15</i>                                                             | <i>S. cerevisiae</i> W303-1B  | (34)       |
| DPB249 | MAT $\alpha$ <i>leu2-3,112 trp1-1 can1-100 ura3::EGFP(S65T)-KanMX6 ade2-1 his3-11,15</i>                                            | <i>S. cerevisiae</i> W303-1B  | This study |
| DPB250 | MAT $\alpha$ <i>leu2-3,112 trp1-1 can1-100 ura3::EGFP(S65T)-KanMX6 ade2-1 HIS3::pGAL1-weakSC_GFP</i>                                | <i>S. cerevisiae</i> W303-1B  | This study |
| DPB251 | MAT $\alpha$ <i>leu2-3,112 trp1-1 can1-100 ura3::EGFP(S65T)-KanMX6 ade2-1 HIS3::pGAL1-strongSC_GFP</i>                              | <i>S. cerevisiae</i> W303-1B  | This study |
| DPB255 | MAT $\alpha$ <i>LEU2::pTEF-Dcr1 trp1-1 can1-100 ura3::EGFP(S65T)-KanMX6 ade2-1 his3-11,15</i>                                       | <i>S. cerevisiae</i> W303-1B  | This study |
| DPB256 | MAT $\alpha$ <i>LEU2::pTEF-Dcr1 trp1-1 can1-100 ura3::EGFP(S65T)-KanMX6 ade2-1 HIS3::pGAL1-weakSC_GFP</i>                           | <i>S. cerevisiae</i> W303-1B  | This study |
| DPB257 | MAT $\alpha$ <i>LEU2::pTEF-Dcr1 trp1-1 can1-100 ura3::EGFP(S65T)-KanMX6 ade2-1 HIS3::pGAL1-strongSC_GFP</i>                         | <i>S. cerevisiae</i> W303-1B  | This study |
| DPB258 | MAT $\alpha$ <i>LEU2::pTEF-Dcr1 TRP1::pTEF-Ago1 can1-100 ura3::EGFP(S65T)-KanMX6 ade2-1 his3-11,15</i>                              | <i>S. cerevisiae</i> W303-1B  | This study |
| DPB259 | MAT $\alpha$ <i>LEU2::pTEF-Dcr1 TRP1::pTEF-Ago1 can1-100 ura3::EGFP(S65T)-KanMX6 ade2-1 HIS3::pGAL1-weakSC_GFP</i>                  | <i>S. cerevisiae</i> W303-1B  | This study |
| DPB260 | MAT $\alpha$ <i>LEU2::pTEF-Dcr1 TRP1::pTEF-Ago1 can1-100 ura3::EGFP(S65T)-KanMX6 ade2-1 HIS3::pGAL1-strongSC_GFP</i>                | <i>S. cerevisiae</i> W303-1B  | This study |
| DPB271 | MAT $\alpha$ <i>leu2-3,112 trp1-1 can1-100 ade2-1 his3-11,15</i>                                                                    | <i>S. cerevisiae</i> W303-1B  | This study |
| DPB272 | MAT $\alpha$ <i>leu2-3,112 trp1-1 can1-100 ade2-1 HIS3::pGAL1-hpSC_URA3</i>                                                         | <i>S. cerevisiae</i> W303-1B  | This study |
| DPB275 | MAT $\alpha$ <i>LEU2::pTEF-Dcr1 TRP1::pTEF-Ago1 can1-100 ade2-1 his3-11,15</i>                                                      | <i>S. cerevisiae</i> W303-1B  | This study |
| DPB276 | MAT $\alpha$ <i>LEU2::pTEF-Dcr1 TRP1::pTEF-Ago1 can1-100 ade2-1 HIS3::pGAL1-hpSC_URA3</i>                                           | <i>S. cerevisiae</i> W303-1B  | This study |

**Table S8.** Plasmids generated in this study.

| Plasmid                                | Description                                                                                                                    |
|----------------------------------------|--------------------------------------------------------------------------------------------------------------------------------|
| pYES2.1-Ago1                           | 2-micron plasmid, <i>S. castellii</i> <i>AGO1</i> under <i>GAL1</i> promoter                                                   |
| pYES2.1-Dcr1                           | 2-micron plasmid, <i>S. castellii</i> <i>DCR1</i> under <i>GAL1</i> promoter                                                   |
| pYES2.1-GFP                            | 2-micron plasmid, <i>GFP</i> under <i>GAL1</i> promoter                                                                        |
| pET101-Dcr1                            | <i>E. coli</i> Dcr1 expression plasmid                                                                                         |
| plp                                    | <i>S. castellii</i> integrating plasmid, empty                                                                                 |
| plp-weakSC_GFP                         | <i>S. castellii</i> integrating plasmid, weak <i>GFP</i> silencing construct under <i>S. cerevisiae</i> <i>GAL1</i> promoter   |
| plp-strongSC_GFP                       | <i>S. castellii</i> integrating plasmid, strong <i>GFP</i> silencing construct under <i>S. cerevisiae</i> <i>GAL1</i> promoter |
| pRS404-P <sub>TEF</sub> -Ago1          | <i>S. cerevisiae</i> integrating plasmid, <i>S. castellii</i> <i>AGO1</i> under <i>TEF</i> promoter                            |
| pRS405-P <sub>TEF</sub> -Dcr1          | <i>S. cerevisiae</i> integrating plasmid, <i>S. castellii</i> <i>DCR1</i> under <i>TEF</i> promoter                            |
| pRS403-P <sub>GAL1</sub> -weakSC_GFP   | <i>S. cerevisiae</i> integrating plasmid, weak <i>GFP</i> silencing construct under <i>GAL1</i> promoter                       |
| pRS403-P <sub>GAL1</sub> -strongSC_GFP | <i>S. cerevisiae</i> integrating plasmid, strong <i>GFP</i> silencing construct under <i>GAL1</i> promoter                     |
| pRS403-P <sub>GAL1</sub> -hpSC_URA3    | <i>S. cerevisiae</i> integrating plasmid, hairpin <i>URA3</i> silencing construct under <i>GAL1</i> promoter                   |

## Supplemental References

- S1. E. Astromskas, M. Cohn, *Yeast* **24**, 499 (2007).
- S2. U. Guldener, S. Heck, T. Fielder, J. Beinhauer, J. H. Hegemann, *Nucleic Acids Res* **24**, 2519 (1996).
- S3. M. D. Krawchuk, W. P. Wahls, *Yeast* **15**, 1419 (1999).
- S4. A. L. Goldstein, J. H. McCusker, *Yeast* **15**, 1541 (1999).
- S5. M. S. Longtine *et al.*, *Yeast* **14**, 953 (1998).
- S6. R. D. Gietz, R. H. Schiestl, *Nat Protoc* **2**, 31 (2007).
- S7. A. Sigova, N. Rhind, P. D. Zamore, *Genes Dev* **18**, 2359 (2004).
- S8. D. Mumberg, R. Muller, M. Funk, *Gene* **156**, 119 (1995).
- S9. R. S. Sikorski, P. Hieter, *Genetics* **122**, 19 (1989).
- S10. G. S. Pall, C. Codony-Servat, J. Byrne, L. Ritchie, A. Hamilton, *Nucleic Acids Res* **35**, e60 (2007).
- S11. C. S. Hoffman, F. Winston, *Gene* **57**, 267 (1987).
- S12. D. J. Garfinkel, M. F. Mastrangelo, N. J. Sanders, B. K. Shafer, J. N. Strathern, *Genetics* **120**, 95 (1988).
- S13. M. J. Curcio, D. J. Garfinkel, *Proc Natl Acad Sci U S A* **88**, 936 (1991).
- S14. S. E. Adams *et al.*, *Cell* **49**, 111 (1987).
- S15. S. D. Youngren, J. D. Boeke, N. J. Sanders, D. J. Garfinkel, *Mol Cell Biol* **8**, 1421 (1988).
- S16. A. Grimson *et al.*, *Nature* **455**, 1193 (2008).
- S17. J. L. Gordon, K. P. Byrne, K. H. Wolfe, *PLoS Genet* **5**, e1000485 (2009).
- S18. C. Neugeglise, H. Feldmann, E. Bon, C. Gaillardin, S. Casaregola, *Genome Res* **12**, 930 (2002).
- S19. C. Llorens, R. Futami, D. Bezemer, A. Moya, *Nucleic Acids Res* **36**, D38 (2008).
- S20. E. R. Havecker, X. Gao, D. F. Voytas, *Genome Biol* **5**, 225 (2004).
- S21. Y. Gelfand, A. Rodriguez, G. Benson, *Nucleic Acids Res* **35**, D80 (2007).
- S22. J. Schultz, F. Milpetz, P. Bork, C. P. Ponting, *Proc Natl Acad Sci U S A* **95**, 5857 (1998).
- S23. I. Letunic, T. Doerks, P. Bork, *Nucleic Acids Res* **37**, D229 (2009).
- S24. C. Notredame, D. G. Higgins, J. Heringa, *J Mol Biol* **302**, 205 (2000).
- S25. J. Soding, A. Biegert, A. N. Lupas, *Nucleic Acids Res* **33**, W244 (2005).
- S26. N. T. Ingolia, S. Ghaemmaghami, J. R. Newman, J. S. Weissman, *Science* **324**, 218 (2009).
- S27. U. Nagalakshmi *et al.*, *Science* **320**, 1344 (2008).
- S28. J. Houseley, K. Kotovic, A. El Hage, D. Tollervy, *Embo J* **26**, 4996 (2007).
- S29. T. J. Goodwin, D. E. Dalle Nogare, M. I. Butler, R. T. Poulter, *Yeast* **20**, 493 (2003).
- S30. C. B. Brachmann *et al.*, *Yeast* **14**, 115 (1998).
- S31. D. R. Scannell *et al.*, *Proc Natl Acad Sci U S A* **104**, 8397 (2007).
- S32. W. A. Fonzi, M. Y. Irwin, *Genetics* **134**, 717 (1993).
- S33. R. F. Petersen *et al.*, *J Mol Biol* **318**, 627 (2002).
- S34. B. J. Thomas, R. Rothstein, *Cell* **56**, 619 (1989).
